# Supplementary material
Source: PubMed Central journal article supplement (PMC5918293)
Supplement: NIHMS959857-supplement-SOM.pdf [file NIHMS959857-supplement-SOM.pdf]

Supplementary Materials for  
**Commensal orthologs of the human autoantigen Ro60 as triggers of autoimmunity in lupus**

Teri M. Greiling, Carina Dehner, Xinguo Chen, Kevin Hughes, Alonso J. Iñiguez, Marco Boccitto, Daniel Zegarra Ruiz, Stephen C. Renfroe, Silvio M. Vieira, William E. Ruff, Soyeong Sim, Christina Kriegel, Julia Glanternik, Xindi Chen, Michael Girardi, Patrick Degnan, Karen H. Costenbader, Andrew L. Goodman, Sandra L. Wolin,\* Martin A. Kriegel\*

\*Corresponding author. Email: martin.kriegel@yale.edu (M.A.K.); sandra.wolin@nih.gov (S.L.W.)

Published 28 March 2018, *Sci. Transl. Med.* **10**, eaan2306 (2018)  
DOI: 10.1126/scitranslmed.aan2306

**The PDF file includes:**

Materials and Methods

- Fig. S1. Sequence alignment of full-length hRo60 and selected commensal orthologs.
- Fig. S2. Coimmunoprecipitation of lupus study subject sera confirmed anti-Ro60 antibody status.
- Fig. S3.  $\alpha$ -Diversity represented by box plots of the Shannon-Weiner diversity index.
- Fig. S4. SCLE skin eruption.
- Fig. S5. TT-reactive CD4<sup>+</sup> T cell clone from a healthy donor generated by a CD4 T cell library assay.
- Fig. S6. Ro60-negative SLE patient CD4<sup>+</sup> T cells lack reactivity to hRo60 protein.
- Fig. S7. Cytokine concentrations (pg/ml) of supernatants from the cross-reactive T cell clone from Fig. 5 measured using a bead-based immunoassay.
- Fig. S8. Anti-Ro60 antibody status of Harvard cohort lupus subjects.
- Fig. S9. Yr1A RNA is not detected in immunoprecipitates from *B. theta* using human lupus sera.
- Fig. S10. *B. theta* monocolonization of GF mice induces gut and systemic immune changes.
- Fig. S11. Schematic of proposed mechanism of how Ro60 bacteria trigger and sustain autoimmunity.
- Table S1. Commensal bacterial Ro60 orthologs identified by in silico methods.

Table S2. Lupus study subject clinical data.

Table S3. Healthy control study subject clinical data.

Table S4. Efficiency and specificity of bacterial Ro60 qPCR primers.

References (63–77)

**Other Supplementary Material for this manuscript includes the following:**

(available at

[www.sciencetranslationalmedicine.org/cgi/content/full/10/434/eaan2306/DC1](http://www.sciencetranslationalmedicine.org/cgi/content/full/10/434/eaan2306/DC1))

Table S5 (Microsoft Excel format). Primary data.

## Supplementary Materials and Methods

### Identification of Ro60 orthologs and YrlA RNAs *in silico*

An initial list of Ro60 orthologs was identified by searching a custom database of human gut microbes (63). A more comprehensive list was generated using an NCBI query for proteins annotated as containing a TROVE domain (64), using the constraints of bacteria as the organism, 400 to 650 amino acids as the length, and GenBank as the source database. This resulted in a list of 1,943 bacterial TROVE proteins. The bacterial species were cross-referenced with the Pathosystems Resource Integration Center (PATRIC) (21) and the Human Microbiome Project (22) for previous identification as a human commensal. Commensal protein sequences were aligned using Clustal Omega and a phylogenetic tree was constructed using the online tool iTOL (65). The Ro60 structure (protein data bank code 1YVR, *Xenopus laevis*) image in Fig. 1B was prepared using PyMOL (66).

For each commensal bacterium possessing a Ro60 ortholog, the genome sequence was collected from GenBank and searched for YrlA RNA using a covariance model built with Infernal (version 1.1) (67) as described (14).

### HLA typing of human subjects

HLA typing was performed as previously published (68) for *HLA-DR3* (*DRB1\*0301*, *DRB1\*0301-0302*) and *HLA-DR15* (*DRB1\*1502*).

### Microbiome collection and sequencing

Oral and skin microbiota samples were collected using sterile gloves with sterile Catch-All Swabs (EpiCentre Biotech) rubbed on the bilateral buccal mucosa for 60 seconds (sec), or pre-moistened in EpiCentre Yeast Cell Lysis Buffer and rubbed vigorously on a 2 cm<sup>2</sup> area of skin for 60 sec. Swabs were stored in Yeast Cell Lysis Buffer at -80°C until DNA was extracted. For DNA extraction, swabs were incubated at 37°C for 1 hour (hr) with shaking. Catch-all swabs were removed from the tube, placed in basket columns (Promega) and spun down to extract all remaining liquid. Samples were bead-beaten using a BioSpec Mini-Beadbeater-16 with 0.1 mm glass beads (MP Bio) for 2 minutes (min) and then incubated for 30 min at 65°C. Samples were cooled on ice for 5 min and then 250 µl of MPC Reagent (EpiCentre) was added to precipitate protein. Samples were centrifuged for 10 min and the supernatant was transferred to a new sterile tube. An equal volume of 100% ethanol was added and then the standard protocol for the Invitrogen PureLink genomic DNA mini kit was followed. DNA quantification and quality were measured via A<sub>260</sub> and A<sub>280</sub> on a NanoDrop 2000 spectrophotometer.

Stool samples were collected by subjects at home in sterile containers and shipped overnight on ice to the laboratory, at which time they were aliquoted and stored at -80°C. 100 to 300 mg of human stool was combined with 1 ml MoBio Bead Solution and 1 mm ceramic beads (BioSpec) and were subjected to bead beating twice for 1 min with a 2-min rest on ice in the middle. Samples were centrifuged and the supernatant was

transferred to a MoBio Garnet Bead tube, heated for 10 min at 65°C, then 10 min for 95°C, then processed per the MoBio Power Soil DNA Isolation Kit protocol.

DNA isolation from microbiota samples was performed as above. The V4 region of the 16S rDNA was PCR-amplified, normalized, pooled, and sequenced using the Illumina MiSeq with 2 x 250bp paired-end reads as described (69). Analysis of 16S sequencing reads was performed as described (70) with the following minor modifications: QIIME (71) analysis was performed with version 1.8 and a quality score cutoff of 30. Filtered operational taxonomic units (OTUs) were rarefied to a depth of 10,000 sequences per sample and OTUs representing less than 0.01% of total abundance were excluded from further analysis.

### **Bacterial culture and preparation**

Anaerobic bacteria were grown in an anaerobic chamber filled with 82% N<sub>2</sub>, 15% CO<sub>2</sub>, 3% H<sub>2</sub> by volume. Liquid cultures were quantified using OD<sub>600</sub> values. All cultures were confirmed by DNA extraction using the Qiagen DNeasy kit for gram-positive bacteria per the manufacturer's instructions and PCR amplification of the 16S rDNA region (forward primer AGAGTTTGATCCTGGCTCAG, reverse primer GACGGGCGGTGWGTRCA, 95°C for 5 min, 30 cycles of 95°C for 10 sec, 60°C for 20 sec, 72°C for 15 sec, 72°C for 10 min), followed by Sanger sequencing.

To prepare whole heat-killed bacteria, frozen stocks were cultured overnight in the appropriate broth at 37°C under anaerobic conditions, then cultured to an optical density at 600 nm [OD<sub>600</sub>] of 1.0. To prepare inactivated bacterial suspensions, bacteria were harvested by centrifugation (8,000 × g for 10 min at 4°C) and washed three times with phosphate-buffered saline (PBS, pH 7.2) to remove secreted proteins, and then re-suspended in PBS. Lastly, bacterial suspensions were heat inactivated at 65°C for 10 min.

For Western blotting experiments, lysates were prepared from pelleted monocultures of bacteria, washed three times with PBS, subject to bead-beating using 0.1 mm glass beads for 2 min, spun down at 10,000 × g for 5 min, and quantified by bicinchoninic acid (BCA) using a BSA standard curve (Thermo Fisher).

### **Detection of Ro60-containing commensals in patient microbiomes**

Quantitative real-time PCR of bacterial Ro60 was performed on a QuantStudio 6 (Applied Biosystems). *B. theta* Ro60 (GenBank EOS03901.1) and total 16S load (72) were measured using 20 ng of stool or control *B. theta* DNA, 250 nM forward and reverse primers (*B. theta* Ro60 forward CCTGCTTGCAACGTGACTTC, reverse TTGGCTGCTTACCGTGAGTT, product length 244 nt; 16S rDNA forward CGGCAACGAGCGCAACCC, reverse CCATTGTAGCACGTGTGTAGCC, product length 146 nt) and Power SYBR green PCR Master Mix (Applied Biosystems) in a total reaction volume of 25 µl, in triplicate. Samples were heated at 50°C for 2 min followed by 40 cycles of 95°C for 10 min, 95°C for 15 sec, 60°C for 1 min.

*P. prop* Ro60 (GenBank CP002734.1, TaqMan custom proprietary primers/probe AICSXLT), *C. amycolatum* Ro60 (GenBank NZ\_ABZU01000011.1, CDS 51027 - 52661, TaqMan custom proprietary primers/probe "CamyRo60"), *A. massiliensis* Ro60

(GenBank AKFT01000221.1, TaqMan custom proprietary primers/probe AID1VR1), and total 16S load (custom degenerate primers and probe as published previously (73)) were measured from 100 ng of oral or skin swab or control bacterial DNA using 10  $\mu$ l TaqMan Multiplex Master Mix (Applied Biosystems), 1  $\mu$ l each of custom TaqMan primers/probes in a 20  $\mu$ l reaction volume, in duplicate. Samples were heated at 50°C for 2 min followed by 50 cycles of 95°C for 10 min, 95°C for 10 sec, 60°C for 1 min.

All commensal ortholog-specific primers and primer/probe sets were validated by calculating the efficiency (Table S4) when used to amplify a range of 10-fold dilutions from 20 ng to 2 pg of the intended template bacterial DNA extracted from single bacterial culture as above. Specificity was tested by using primers to amplify 20 ng of off-target bacteria with (*B. theta*, *P. prop*, *A. mass*, *C. amyc*) and without (*P. acnes*, *R. intes* (*R. intestinalis*)) Ro60 orthologs (Table S4). Some custom proprietary TaqMan primer/probe sets amplified a gene product from off-target bacteria but usually this was at a concentration that would require at least a 100-fold higher amount of off-target bacteria than the intended template.

Genomic DNA from the species-specific Ro60 genes were used to represent the species-specific bacterial load and compared with the total 16S load to normalize between samples. Replicates were averaged and bacterial load was quantified using the delta-delta-Ct method per the formula:  $2^{-((C_t \text{ of sample Ro60} - C_t \text{ of sample 16S}) - (C_t \text{ of control bacteria Ro60} - C_t \text{ of control bacteria 16S}))}$ . If replicates were not concordant, i.e., only one well failed to amplify, the assay was repeated with a new sample.

### **Purification of recombinant human and bacterial Ro60 proteins**

Recombinant human Ro60 was made using both an insect cell and a mammalian system. Human Ro60 cDNA (74) was inserted into the BamHI/HindIII sites in pFastbac1 (Invitrogen), expressed in High Five insect cells and purified as described (75) except that purified protein was stored in 5 mM DTT. Human Ro60 cDNA was also inserted into the BamHI/NotI sites in pcDNA3.1 (Thermo Fisher Scientific), containing a 12xHis-tag vector. Expi293 cells (Thermo Fisher Scientific) were transfected using Expifectamine (Thermo Fisher Scientific). 72 hr post-transfection, cells were lysed by sonication on ice, using a mix of lysis buffer and protease inhibitors (25 mM HEPES, 2 mM EDTA, 25 mM NaF, 0.01% sodium dodecyl sulfate (pH 7.4), protease inhibitor mixture (Roche)). For purification, the lysate was added to the Ni-NTA resin (Qiagen), washed in 50 mM NaH<sub>2</sub>PO<sub>4</sub>, 300 mM NaCl, 20 mM imidazole (pH 8.0), and eluted in 250 mM imidazole of this buffer. The protein was dialyzed overnight and protein purity was confirmed via Coomassie staining. This protein was used in Fig. 3C and F, while baculovirus-expressed hRo60 was used in all other figures.

DNAs encoding bacterial Ro60 orthologs were amplified from genomic DNA and the encoded proteins expressed in *Escherichia coli* BL21(DE3) cells. The *B. theta* Ro60 coding sequence was inserted into the EcoRI/NotI sites of pETDuet-1 (Novagen) while the *P. prop* Ro60 sequence was cloned into the BamHI/NotI sites of the same vector. To purify *B. theta* Ro60, BL21(DE3) cells harboring pETDuet-1-His-Ro60 were grown to

OD<sub>600</sub> = 0.5, incubated on ice for 20 min and IPTG added to 0.1 mM. After 18 hr at 25°C, cells were resuspended in lysis buffer B (50 mM NaH<sub>2</sub>PO<sub>4</sub>, 300 mM NaCl, 10 mM imidazole pH 8.0, 2 mg/ml lysozyme, 1X protease inhibitor cocktail), incubated on ice for 30 min and lysed by sonication. Ro60 was purified using Ni-NTA resin (Qiagen) and Heparin Sepharose CL-6B (Pharmacia). Briefly, after applying the lysate to Ni-NTA resin, and washing with 50 mM NaH<sub>2</sub>PO<sub>4</sub>, 300 mM NaCl, 20 mM imidazole (pH 8.0), Ro60 was eluted with 250 mM imidazole in the same buffer. Eluates were pooled and applied to a Heparin Hitrap column (GE Healthcare), washed with 25 mM Tris-Cl pH 8.0, 0.3 M NaCl, 3mM MgCl<sub>2</sub>, 0.1 mM EDTA, 2.5 mM β-mercaptoethanol, and eluted with 25 mM Tris-Cl (pH 8.0), 0.6 M NaCl, 3 mM MgCl<sub>2</sub>, 0.1 mM EDTA, 5 mM DTT. Purification of *P. prop* Ro60 was similar except that 0.2 mM IPTG was used to induce expression and the cells were incubated afterwards for 5 hr at 25°C.

### **Immunoassays**

Enzyme-linked immunosorbent assay (ELISA) for anti-Ro60 IgG was performed with 96-well polystyrene flat-bottom high-binding plates (Corning) coated with 1 µg/ml recombinant Ro60 protein in 0.05 M carbonate-bicarbonate buffer pH 9.2 for 2 hr, washed three times with PBS with 0.05% tween-20, blocked with PBS tween-20 with 4% bovine serum albumin (BSA, Sigma) for 2 hr, and incubated with serum overnight at 4°C. Wells were washed three times with PBS tween-20 and incubated with horseradish peroxidase (HRP) conjugated secondary antibody (sheep anti-human IgG 1:6000 or rabbit anti-mouse IgG 1:1000 (ThermoFisher Scientific)) for 30 min, followed by another 6 washes with PBS tween-20 and colorimetric development with TMB Substrate Buffer (Thermo Scientific) stopped after 15 min with 2M H<sub>2</sub>SO<sub>4</sub>. The optical density (OD) was measured at 450 nm and 650 nm. Human Ro60 IgG samples were also tested with the Fooke Ro60 ELISA (Mikrogen Diagnostik) in duplicate using the manufacturer's protocol. Both methods rendered the same results.

Cytokine concentrations from supernatants of memory CD4<sup>+</sup> T cell clones were measured with the bead-based immunoassay LEGENDplex (Biolegend, human Tfh and Th panels). Supernatants of activated T cell clones stimulated as detailed in the figure legends were collected run according to the manufacturer's protocol.

### **T cell cloning, tetramers, and proliferation assay**

PBMCs were isolated from whole blood by Lymphoprep (STEMCELL Technologies) gradient centrifugation. PBMCs were immunomagnetically separated using the following kits (STEMCELL Technologies) per manufacturers' instructions: B lymphocytes using the EasySep Human CD19 Positive Selection Kit, monocytes using the EasySep Human CD14 Positive Selection kit, and CD4<sup>+</sup> T cells using the EasySep Human CD4<sup>+</sup> T Cell Isolation Kit. Selected cells were cooled in 90% human AB serum with 10% dimethyl sulfoxide to -80°C at -1°C/min and transferred to liquid nitrogen within 24 hr. Monocytes were used as antigen-presenting cells for the T cell library assay. Viable CCR6<sup>-</sup> memory (CD45RA<sup>-</sup>CD45RO<sup>+</sup>CD25<sup>-</sup>CCR6<sup>-</sup>) CD4<sup>+</sup> T cells and CCR6<sup>+</sup> memory

(CD45RA<sup>-</sup>CD45RO<sup>+</sup>CD25<sup>-</sup>CCR6<sup>+</sup>) CD4<sup>+</sup> T cells were sorted to at least 97% purity (antibodies from Biolegend) on a FACS Aria machine (BD Biosciences).

The DR0301\* soluble class II molecules were generated at the Tetramer Core Laboratory of the Benaroya Research Institute (W. Kwok) as described (76). The Ro60 peptide p370-384 was synthesized to load HLA-DR0301\*0401 to generate MHC class II tetramers. Phycoerythrin (BioSource International)–conjugated streptavidin was used for cross-linking of peptide–MHC II monomers.

The T cell library assays were performed as previously described (32). After sorting, CCR6<sup>-</sup> memory and CCR6<sup>+</sup> memory CD4<sup>+</sup> T cells from SLE patients or healthy controls were sorted and cultured in 96-well round-bottom plates (Corning) at 2000 cells per well in X-Vivo Media (Lonza), and stimulated with phytohemagglutinin (PHA, 1 mg/ml) (Roche) and IL-2 (30 U/ml) (Invitrogen) in the presence of irradiated (45 Gy) allogeneic PBMCs as feeder cells (25000 per well). In the case of tetramer-positive cells, T cells were single-cell sorted directly into plates containing the feeder cells. IL-2 was added on days 3, 6, and 10. After 14 days of maintenance and expansion, T cell cultures were washed and split equally into two “mirror” 96-well plates. Library screening was carried out by stimulation of 250,000 T cells per well with irradiated (45 Gy) autologous monocytes (~25,000 per well). The monocytes were then pulsed for 3 hr with 100 µg/ml recombinant mouse or human Ro60 protein or tetanus toxoid (TT) (1 µg/ml). Positive control wells were expanded and then re-stimulated at a ratio of 1:10 with irradiated autologous monocytes that were pulsed with either whole heat-killed bacteria or commensal mimic peptides. Negative control wells contained monocytes alone to assess any background signal. After 64 hr, culture supernatants were removed for cytokine measurement using a bead-based immunoassay (Legendplex, Biolegend). Cell proliferation was measured either by measuring [<sup>3</sup>H]-thymidine incorporation on a scintillation β-counter (Perkin Elmer) or alternatively non-radioactive ATP measurement using the ATP lite kit (Perkin Elmer) as indicated in the figure legends.

### **TCR Sequencing**

Individual T cell clone total cDNA was obtained after lysis (0.2% Triton, 2.5U RNase Inhibitor) of 10<sup>3</sup>– 5 × 10<sup>3</sup> cells/reaction. The reverse transcription was performed using oligo dT(18) primers (Life Technologies) and Superscript III (Life Technologies), in a reaction mix containing DTT, dNTPs, and 5X Buffer. Reactions were run with the following conditions: 25°C x 10 min, 50°C x 1 hr, 94°C x 5 min. TCR sequences from T cells were identified from cDNA. Three µl of cDNA were used for PCR (final volume 25 µl) containing HotStart DNA Polymerase (Qiagen). Sequences were amplified using designed TCR Vβ-specific forward primer pools and TBC-rev reverse primers pairing to C1-C2 β chain constant region, respectively (34). PCR reactions were performed with the following conditions: 95°C x 1 min; (95°C x 20 sec; 50°C x 20 sec; 72°C x 30 sec) x 45 cycles; 72°C x 3 min. Amplified fragments were sequenced through Sanger method using TBC-rev primer.

### Immunoprecipitation of RNPs from human cell lysates

Five  $\mu$ l of each patient serum was coupled to SureBeads protein G magnetic beads (Bio-Rad) in PBS [137 mM NaCl, 2.7 mM KCl, 18 mM Na<sub>2</sub>HPO<sub>4</sub>, 2 mM KH<sub>2</sub>PO<sub>4</sub> (pH 7.4)] at room temperature for 30 min. Beads were washed once in PBS and then resuspended in NET-2 lysis buffer (50 mM Tris-HCl pH 7.4, 150 mM NaCl, 1 mM MgCl<sub>2</sub>, 0.5% Nonidet P-40). After lysing HEK293T cells by sonicating in NET-2 containing 1X complete protease inhibitors (Roche Applied Science), 100  $\mu$ M PMSF, 200 U/mL RNase OUT (Invitrogen), lysates were added to the beads and incubated for 30 min at room temperature. The beads were washed three times in 750  $\mu$ l of NET-2, transferred to new microcentrifuge tubes, and washed an additional three times. After resuspending beads in 350  $\mu$ l NET-2 containing 2  $\mu$ l glycogen, 0.25% SDS and 0.3 M NaOAc, RNAs were extracted with phenol:chloroform:isoamyl alcohol (25:24:1, v/v), and precipitated with 2.5 volumes ethanol. RNAs were labeled with [<sup>32</sup>P]pCp and fractionated in 5% polyacrylamide, 7 M urea gels.

### Immunoprecipitation and Northern blotting

After growing *P. prop* in liquid medium, bacteria were pelleted, washed in 1 $\times$  Dulbecco's phosphate-buffered saline (PBS) (Gibco), and resuspended in ice-cold lysis buffer A (20 mM Tris-HCl pH 7.5, 100 mM NaCl, 5% glycerol, 0.1% NP-40, 1 mM MgCl<sub>2</sub>, 1 mM PMSF, 2.5 mM vanadyl ribonucleoside complexes and 1x protease inhibitor cocktail). Droplets of bacterial cells were flash-frozen in liquid nitrogen and lysed by cryogenic grinding with a planetary ball mill (Retsch). After resuspending 1 gram of the powder in 3.5 ml lysis buffer A and removing debris by sedimenting twice at 15,000  $\times$  g, proteins that bind non-specifically were removed by incubating the lysates for 20 min with protein A Sepharose CL-4B (Pharmacia) that had been pre-swollen in lysis buffer A. Afterwards, supernatants were aliquoted and incubated with 20  $\mu$ l human sera for 1 hr at 4°C, followed by incubating with 15  $\mu$ l protein A Sepharose 4B for 1 hr at 4°C. After washing the beads 4 times with lysis buffer A, RNA was extracted using phenol/chloroform/isoamyl alcohol (50:50:1), fractionated in 6% polyacrylamide/8 M urea gels, transferred to Hybond (Amersham) and RNA crosslinked to the membrane as described (60). Hybridization with [<sup>32</sup>P]ATP-labeled oligonucleotides was as described (61). Oligonucleotides were: *P. prop* YrIA RNA: 5'-ATCCCTGATAACCGATCCCCTGCGG-3' and 5'-CAACCTCCTGATCCCTGATAAC-3'; *P. prop* tRNA<sup>Pro</sup>: 5'-TTGTCGGGCTGACAGGATTTG-3'.

Immunoprecipitation of *B. theta* RNPs was performed similarly, except that after harvesting, cells were lysed by passing through a French press (Thermo IEC) at 10,000 psi. For detecting *B. theta* YrIA RNA, asymmetric PCR products used as probes were prepared as described (77) with the following modifications. Briefly, 250 ng of template genomic DNA extracted from cultured *B. theta* was used for asymmetric PCR amplification of the YrIA RNA using 0.01  $\mu$ mol of forward primer (TGTCGTAGAGAAGAGTTACTTCG) and 0.2  $\mu$ mol of reverse primer (ACAAGGTAACAAACGAAAAGAGAC), incorporating [<sup>32</sup>P]-dCTP. Cycling parameters were 94°C for 1 min followed by 60 cycles of 94°C for 30 sec, 55°C for 30



sec, 72°C for 30 sec with a second addition of Taq DNA Polymerase after the 30<sup>th</sup> cycle, then a final 72°C for 3 min and 4°C hold.

### **16s rRNA FISH on human skin tissue**

The 16S rRNA-targeted oligonucleotide probes used in this study were a previously published *P. prop*-specific probe (29) and a previously published eubacterial probe EUB338 (28). For *in situ* hybridization, the probes were labeled with either FITC or Cy3. Formalin-fixed, paraffin embedded SCLE skin biopsies were obtained from the Dermatopathology laboratory at Yale and were de-paraffinized in xylene and absolute ethanol.

Hybridizations were performed at 46°C for 2 hr with hybridization buffer (0.9 M NaCl, 20 mM Tris-HCl [pH 7.5], 0.05% sodium dodecyl sulfate, 20% formamide) containing 0.5 ng/μl of each labeled probe. A washing step was done at 46°C for 10 min with washing buffer (0.215 M NaCl, 20 mM Tris-HCl [pH 7.5], 0.05% sodium dodecyl sulfate, 0.025 EDTA). Slides were air-dried and then mounted using Antifade Mounting Media (Invitrogen) with DAPI. Finally, the slides were visualized with a Leica Confocal Microscopy.

### **Western Blotting**

15 μg of bacterial lysates, 4 μg of recombinant *B. theta* Ro60 protein, and 0.35 μg of human Ro60 protein were loaded on a 4-12% gradient SDS gel. Human sera were incubated overnight as the primary antibody in 5% BSA in PBS Tween-20 at a dilution of 1:1000. Anti-human IgG as secondary antibody was used at a dilution of 1:10000 in PBS and blots were developed using enhanced chemiluminescence substrate (Pierce).

### **Mice**

GF C57Bl/6 mice were housed in gnotobiotic isolators at the Yale Gnotobiotic Animal Facility. Four males and twelve females at 6 weeks of age were orally gavaged with 0.2 ml of thawed *B. theta* at  $\sim 1.3 \times 10^9$  cells/ml in 20% glycerol. Colonization was confirmed by DNA extraction from the fecal pellet 2 weeks after colonization, PCR amplification of the 16S region, and Sanger sequencing. One animal was found dead 5 months after gavage but animals otherwise appeared healthy. After 3 months (n = 7) or 5 months (n = 8), mice were anesthetized with isoflurane for terminal blood collection and sacrificed with CO<sub>2</sub> asphyxiation for organ collection.

To see if irritants would augment the adaptive immune response to Ro60, subsets of mice were treated with 1-2% DSS (MP Bio) and/or oral imiquimod (0.1% w/v, Sigma) in the drinking water. DSS therapy consisted of 3 cycles of 7 days DSS followed by 7 days of water at 3-4 months of age. Imiquimod therapy was continuous from 5 months of age until sacrifice. Of the four cages of mice, one was treated with DSS + imiquimod (n = 4), one with imiquimod alone (n = 4), one with DSS alone (n = 4), and one was not treated (n = 3). No differences between cohorts in B or T cell reactivity, no organ damage, and no

skin lesions were observed, so all animals were analyzed as one cohort (n = 15, Fig. 8A-C).

A second group of C57Bl/6 GF mice were treated with topical imiquimod three times weekly from age 8 to 16 weeks (Fig. 8G-K) to mirror an inducible lupus model as previously described under SPF conditions (44). 14 C57Bl/6 mice remained GF and 6 mice were monocolonized with *B. theta* as above. Half of each group was treated with topical imiquimod.

GF non-obese diabetic (NOD) mice were received from L. Wen (Yale) and housed in gnotobiotic isolators. Three 11-week old males and three 6-week old females were orally gavaged as above. Mice were sacrificed after 2 weeks for blood and organ collection (Fig. 8D-F).

### **Lymph node and spleen proliferation assay**

Mouse mesenteric lymph nodes and spleen were harvested in RPMI 1640 medium (Life Technologies) supplemented with 2 mM L-glutamine, 2 mM HEPES, 0.1 mM nonessential amino acids, 1 mM sodium pyruvate, penicillin (50 U/ml), streptomycin (50 U/ml, Lonza), and 10% fetal calf serum. Tissue was ground with the rubber stopper of a 3-ml syringe over a 70- $\mu$ m cell strainer and washed into RPMI. For spleens, red cells were lysed with 1 ml of red blood cell lysing buffer (Sigma) for 3 min, then washed three times with PBS. Cells were plated in 96-well plates at 100,000 cells per well in 100  $\mu$ l of RPMI. Another 100  $\mu$ l of stimulus was added and cells were incubated at 37°C for 72 hr. Stimuli included *B. theta* lysate from cultured bacteria (bacteria were washed three times with PBS, bead-beaten using 0.1 mm glass beads for 2 min, spun down at 10,000 x g for 10 min); recombinant *B. theta* Ro60, recombinant human Ro60; anti-CD3-epsilon 0.5 mg/ml (BioLegend) and anti-CD28 0.5 mg/ml (BioLegend); bovine serum albumin (Sigma); and human serum purified  $\beta_2$ -glycoprotein-I (Haematologic Technologies). After 72 hr, cells were transferred to white opaque 96 well plates (Greiner). Proliferation was measured using the CellTiter-Glo Luminescent Cell Viability Assay (Promega) or the Perkin Elmer ATPlite 1 step as per the manufacturer's protocol.

### **Kidney immunofluorescence**

Mice were anesthetized with ketamine and perfused with 15 ml of Dulbecco's PBS. Kidneys were fixed in PLP (4% paraformaldehyde, 0.2 M L-Lysine, 0.2% metaperiodate in phosphate buffer pH 7.4) overnight. They were then washed in PBS, dehydrated in 20% sucrose for at least 4 hr and frozen in OCT compound (Sakura). 10- $\mu$ m cryosections were rehydrated, blocked with 0.1M Tris-HCl pH 7.4, 2% fetal bovine serum, 0.3% Triton X-100 for 30 min and stained with the following primary antibodies overnight at 4°C: FITC-coupled rabbit anti-mouse IgG, IgA, IgM (1:100, Abcam), anti-mouse C1q (1:100, Abcam), anti-rat C3 (1:100, Abcam). Slides were rinsed 3 times with PBS for 5 min before incubating with secondary antibodies for 2 hr at room temperature: donkey anti-rat Cy5 (1:300, Jackson Laboratories) and goat anti-mouse Cy3 (1:600, Jackson Laboratories). Slides were counter-stained with 4',6-diamidin-2-fenilindolo (DAPI). Finally, slides were mounted with Prolong AntiFade mounting medium (Invitrogen).

Confocal microscopy was performed on a Leica TCS SP5 laser confocal scanner mounted on a Leica DMI 6000B inverted microscope equipped with motorized stage. All images were acquired with a HCX PL APO 40X (NA 1.25) oil immersion objective. Leica LAS AF was used for all acquisitions. ImageJ software package or Imaris (Bitplane) were used for image analysis and fluorescence quantification.

### **Intracellular FOXP3+ staining and flow cytometry**

Cells isolated from spleen or small intestinal lamina propria were surface-stained in FACS buffer (PBS, 2% bovine serum albumin) for 30 min in the dark at room temperature with fluorescently conjugated antibodies specific to CD3 $\epsilon$ , CD4, CD8, CD45, CD45R (B220), PDCA-1, CD11c, CD11b, and MHCII. For intracellular staining, cells were fixed overnight and stained with fluorescently conjugated antibody specific for FoxP3 (BD Biosciences) for 45 min in the dark at room temperature using a Mouse FOXP3 Buffer Set (BD Biosciences). Cell viability was assessed with a Fixable Viability Dye (eBioscience). Samples were collected by an LSR II flow cytometer (Becton Dickinson). All flow cytometry data were analyzed by FlowJo version 10 (Tree Star).

|                     |                                                                                    |     |
|---------------------|------------------------------------------------------------------------------------|-----|
| H. sapiens          | -----MEESVNMQOFLNEKQIANSODGYVQVDTMNRLLRFLCFGSEGGTYIYKQKLGLENAEAL                   | 61  |
| M. musculus         | -----MEGSANLOPLSETQVYNSSEGGCVWQVDTMNRLLRFLCFGSEGGTYIYKQKLGLENAEAL                  | 61  |
| P. propionicum      | MVANTNRKGGNTMDVLRINLRSTPQSPADERQVONSAGGHTFQLDDAARLRRLTLGVDAAGTYASAKELAIDNVEVL      | 80  |
| C. amycolatum       | -----MDSLHNFSFENTPOQVRASEKQVONSAGGHTFELDDKARLRRLTLGVDEGGTYFANARHLAFONVQIL          | 68  |
| A. massiliensis     | -----MDILSDISTRITPQSORAAANQEPNSAGGYTFLDDAARLRRLTLGVDEGGTYTSAQDLAIDNLEVL            | 68  |
| B. thetaiotaomicron | -----MMKFNWINKGMNKVLNKESAPARLTPWEELYTSVVTISLNNSEYEQE-----ERIERV                    | 55  |
| H. sapiens          | IRLTIEDGRGCEVTQETKSFQEGRTTKQEPMLFALATCSQCSDSITKQAAFKAVSEVCRIPHTLFTTFIQFKKDLRESMKC  | 141 |
| M. musculus         | IRLTIEDGRGCEVTQETKSFQEGRTAKQEPMLFALAVCSQCADINTKQAAFKAVPEVCRIPHTLFTTFIQFKKDLRESMKC  | 141 |
| P. propionicum      | KRLAASEP-ETLVATIVDVSVRGAAPRQNPVLFALAYAAVSP--ASAPLALAALPKVARTGTHLFTFADYVQCFRG----   | 153 |
| C. amycolatum       | QRNAVNDP-VTLVDTIVDVSVSGAAPKQCPALFALAFAAVSP--QSSQAALAALPRVARTGSALLCFYSYVEKFRG----   | 141 |
| A. massiliensis     | KRLAVEAP-RTLVDIVVEVSTSGAAPRQNPVLFALAYATSVP--QTRAAALAALPKVARTGSHLFTFAGYTEQFRG----   | 141 |
| B. thetaiotaomicron | RTLIGKCN-PLFVAQIAAARETMNLRISPLVMAVELARIHQGDNLVKRVARTVRRADEITELLACYQANRRITG----T    | 131 |
| H. sapiens          | GMWGRALRKATADWYNEKGGMALALAVTIKYQRNGWSHKDLLRLSHLKPSSSEGLAIVTKYITIKGWKEVHELKYEKALSVE | 221 |
| M. musculus         | GMWGRALRKAVADWYNEKGGMAVALVVTIKYQRNGWSHKDLLRLSHLKPSSSEGLAIVTKYITIKGWKEVHEEYKALSVE   | 221 |
| P. propionicum      | --WGRGLRRAVGNWYTGRRADDLAHQVYKQRSGWTHRDLLRLSHPVTTVPELRLAFWIVRG-----SL               | 217 |
| C. amycolatum       | --WGRGLRRAVGNWYSTKNSDDLAYQVYKRNRCGWSHRDLLRLAHPSTSDSLRATTFDWIVRG--GSASISVAGDTS      | 217 |
| A. massiliensis     | --WGRGLRRAVGSWYTSRTADRLAYQVYKQRSGWTHRDLLRLAHPRTDDAGLGATFDWIAHG-----AV              | 205 |
| B. thetaiotaomicron | KKLNRLSKQLQAGLQAFNTFDAYQFAKYNRSAEVCLKDALFLVHPKAKDEROQETFNGLVND-----N               | 195 |
| H. sapiens          | TEKLLKYLEAVEKVKRTRKDELEVTHLIEEHLVREHLLTNHLKSKEVWKALLOE-MPLTALLRNLGKMTANSVLEPGNSE   | 300 |
| M. musculus         | AEKLLKYLEAVEKVKRTRKDDLEVTHLIEEHLVREHLLTNHLKSKEVWKALLOE-MPLTALLRNLGKMTANSVLEPGNSE   | 300 |
| P. propionicum      | GEDTPELVRAFLAAQEAATVAAWVALVREHRLAWEMLPDAALREPEVNEALLDAGLPQATLMRQLPRLTGLGLLDLSAR    | 297 |
| C. amycolatum       | SENIPTEIEGFTIKASHTTSSQAAALIRGYLSWEMLPDAALGEPEVNDALLETGVPQATAVIRQLPRLTRLGLPLGLGGR   | 297 |
| A. massiliensis     | GEATPSLIEGFTKAQEAATIARSWAQTVRDLYRLTWEMLPDAALARPEVNDALLDVGVPMTALMRQLPRLTRLGMLPAIGGR | 285 |
| B. thetaiotaomicron | -LPVPYTWETELSGLQRTFATEEERRKAFRAKWEELTDSGK----LGMALLRN-----LRNLEAEVSDAH             | 258 |
| H. sapiens          | VSLVCEKLCNEKLLKKARITHPHILIALETYKTHGLRGLKLRPDEEILKALDAAFYKTFKIVE--PTGKRFLAVDVS      | 378 |
| M. musculus         | YSLTCEKLSNEKLLKKARITHPHVLTIALETYRAGHLRGLKLRPDKDILQALDAAFYKTFKIVE--PTGKRFLAVDVS     | 378 |
| P. propionicum      | TEQVCAQITDPDRLRRARVHPVNVLVAGRTYASGRSTRGSSWQPSKTVLDALDAAFYAAFGAVT--PSGKRMTLAVDVS    | 375 |
| C. amycolatum       | TSDVVSQITNAERLRARITHPVSVLAAGRTYAKGRSHGMTWEPTARISDALDAAFYLSFGAVK--PANKRRTLAVDVS     | 375 |
| A. massiliensis     | TREVCAQITDADRLLKARVHPVSVLVAGRTYAGGASHRGTAQWEPTTKVADALDAAFYAAFGAVE--PSGRRMTLAVDVS   | 363 |
| B. thetaiotaomicron | ILTVGKRLSSEKAVENSRQLPFRFLAAYRELKTPSLYAT-----MLNTALERAVQVSARNITGFDESTRLIADVS        | 331 |
| H. sapiens          | ASMNQRVLGSILNASTVAAAMQMVVTRTEKDSYVVAFSDE-----MVPQPVITDMTLQQVLMAMSOIPAGGTDCS        | 448 |
| M. musculus         | ASMNQRALGSVLNASTVAAAMQMVVTRTEKESVVAFACD-----MVPFPVITDMTLQQVLTAMNKVPAGNTDCS         | 448 |
| P. propionicum      | GSMCSHIAGLPITAREASAALALVQLATEPVSANVVGFTSG-----LVPLDLSPRQRDDALHRIKGLPFGGTDCA        | 445 |
| C. amycolatum       | ASMHWPLGDTPLTARDASAALSLLVLAATESMVLGFTTNSLTKGFLRDVVPLDISPRQRLLDDVLDYLDGLPFGGTDCA    | 455 |
| A. massiliensis     | GSMTMPISGMAITAREASAALALVQLATEPEAEYGFSSAGGWY---KPALTPLGTSPPRRLLDAAVAVSSIPVGGTDCA    | 440 |
| B. thetaiotaomicron | GSMQCPVSAKSKVLYYDITLLGLMLKSRCKQVMTGIFGDR-----WKITNLPDTIGILSNVDAFYKREGEVGYSTNGY     | 404 |
| H. sapiens          | LPMTIWAQKTNTPADVFIIVTDNETFAGVHPAIA-LREYRKKMIPAKLIVCGMTSNGFTIADPDDRGMLDVCGFDTAAL    | 527 |
| M. musculus         | LPMTIWAQKTDTAADVIVVTDNETFAGVHPAVA-LREYRKKMIPAKLIVCGMTSNGFTIADPDDRGMLDVCGFDTAAL     | 527 |
| P. propionicum      | QPMLHALKRRLEVDTFVYTDNETVCGRTHPHQA-LVRYRRETGIPAKLVVVGMTSTGFSAIDPDDAGMLDVAGFDHAVP    | 524 |
| C. amycolatum       | LPMLYALENSLEVDTFVIYTDNETWAGKMHPHQA-LQRYRKESGIDAKLVVAGMTATKFSIANPDDAGMLDVVGFDAAVP   | 534 |
| A. massiliensis     | LPMLHATEQGLEVDTFVIYTDNETWYGVHPHQA-LRRYRECSGIDARLIVVGMTSTGFSAIDPDDPGLDVVGFDAAVP     | 519 |
| B. thetaiotaomicron | LVKDLIDRKAQMDKIMMFTDQLVNSHSDLQITDLIRKYKKTCPAAKLYLFDLSGYCNPPLITRDDVFLIAGISDKIF      | 484 |
| H. sapiens          | DVIRNFTLDMI                                                                        | 538 |
| M. musculus         | DVIRNFTLDVI                                                                        | 538 |
| P. propionicum      | NLISEFSRGF                                                                         | 534 |
| C. amycolatum       | NLISEFSRGF                                                                         | 544 |
| A. massiliensis     | SLITTEFARGF                                                                        | 529 |
| B. thetaiotaomicron | DITLSAIDKGNDALQEIKKIV                                                              | 505 |

**Fig. S1. Sequence alignment of full-length hRo60 and selected commensal orthologs.** GenBank protein accession numbers for Ro60 sequences: *H. sapiens*, NP\_001166995.1; *M. musculus*, NP\_038863.1; *P. propionicum*, AFN45864.1; *C. amycolatum*, EEB62751.1; *A. massiliensis*, EJJ36407.1; *B. thetaiotaomicron*, ALJ40817.1. Black highlight indicates identical amino acids. Blue highlight indicates similar amino acids. The three possible start sites for *B. theta* Ro60 are indicated by asterisks.

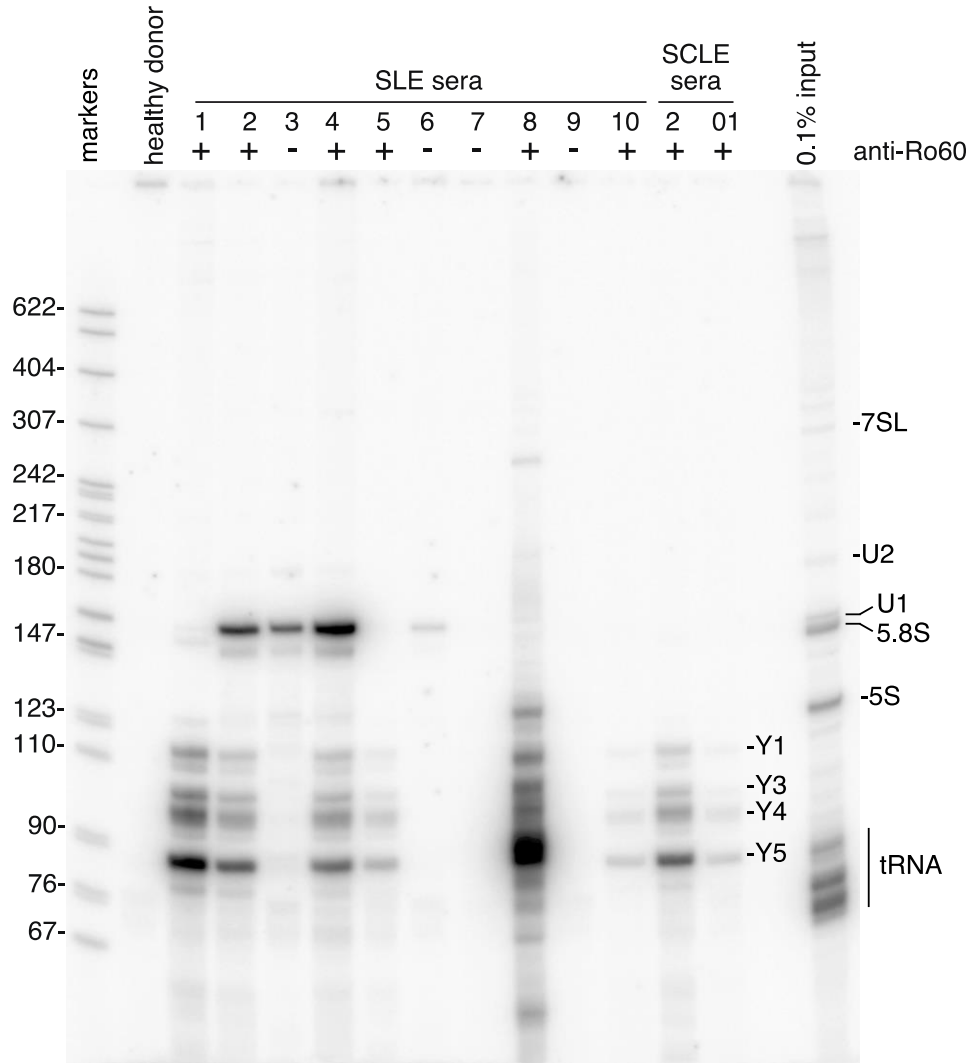

**Fig. S2. Coimmunoprecipitation of lupus study subject sera confirmed anti-Ro60 antibody status.** Lupus sera were incubated with HEK293T cell lysate and the resulting extracted RNA was labeled with  $^{32}\text{P}$ -pCp. Markers with nucleotide size are shown in lane one and a negative healthy control in lane two. Ten SLE sera and two SCLE sera are shown in the following lanes, with + or - indicating anti-Ro60 IgG positivity by ELISA. The RNAs extracted from the total HEK293T cell lysate are shown in the last lane.

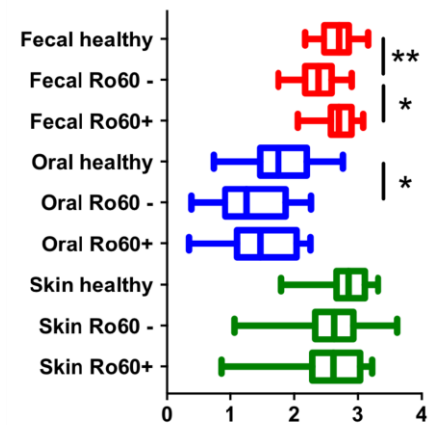

**Fig. S3.  $\alpha$ -Diversity represented by box plots of the Shannon-Weiner diversity index.** Healthy (n=7) and anti-Ro60+ lupus patient (n=15) fecal (red), oral (blue) or skin (green) microbiomes. Black bars show significance between groups measured by t-test (\*p<0.05, \*\*p<0.01).

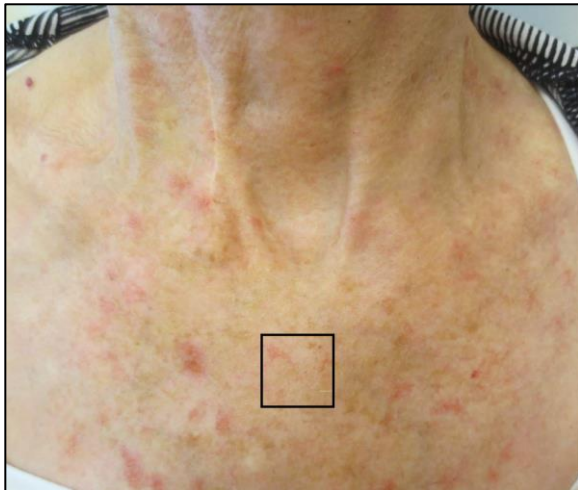

**Fig. S4. SLE skin eruption.** The chest skin swab (boxed region) from patient SCLE01 was collected from an active eruption of SLE for microbiome analysis (photo published with written consent).

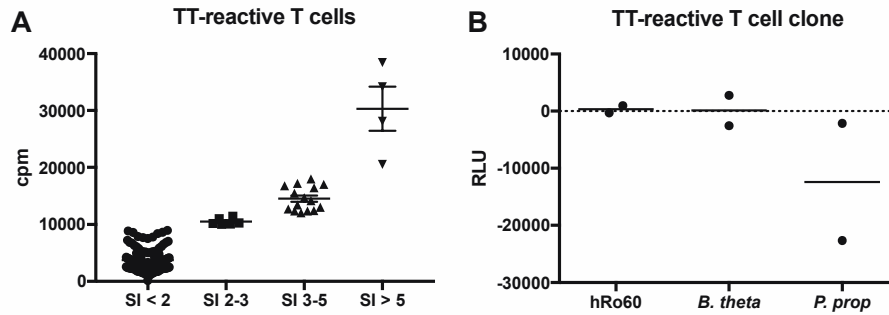

**Fig. S5. TT-reactive CD4<sup>+</sup> T cell clone from a healthy donor generated by a CD4 T cell library assay.** (A) TT-specific T cell clones were generated as described for Ro60-reactive T cell clones. X-axis indicated stimulation index (SI) and y-axis indicated proliferation measured by tritiated thymidine as counts per minute (cpm). Each point on the graph represents one clone. (B) One of the four clones with SI > 5 was re-stimulated with hRo60 or Ro60 commensal bacteria as indicated (*B. theta*, *P. prop*). Proliferation shown on the y-axis was measured with an ATP release assay as reactive light units (RLU).

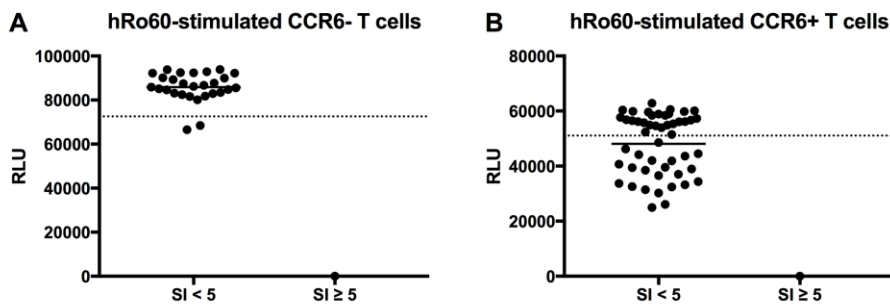

**Fig. S6. Ro60-negative SLE patient CD4<sup>+</sup> T cells lack reactivity to hRo60 protein.** T cells from one Ro60-negative SLE patient were expanded with hRo60 using a T cell library assay as above. T cell activation shown on the y-axis was measured with an ATP release assay as reactive light units (RLU). Dotted line represents background of monocyte-T cell co-cultures without the hRo60 protein. CCR6<sup>-</sup> (A) or CCR6<sup>+</sup> (B) T cell subsets separated by stimulation index (SI), with SI ≥ 5 indicating proliferation. No CCR6<sup>-</sup> or CCR6<sup>+</sup> clones were identified with SI ≥ 5.

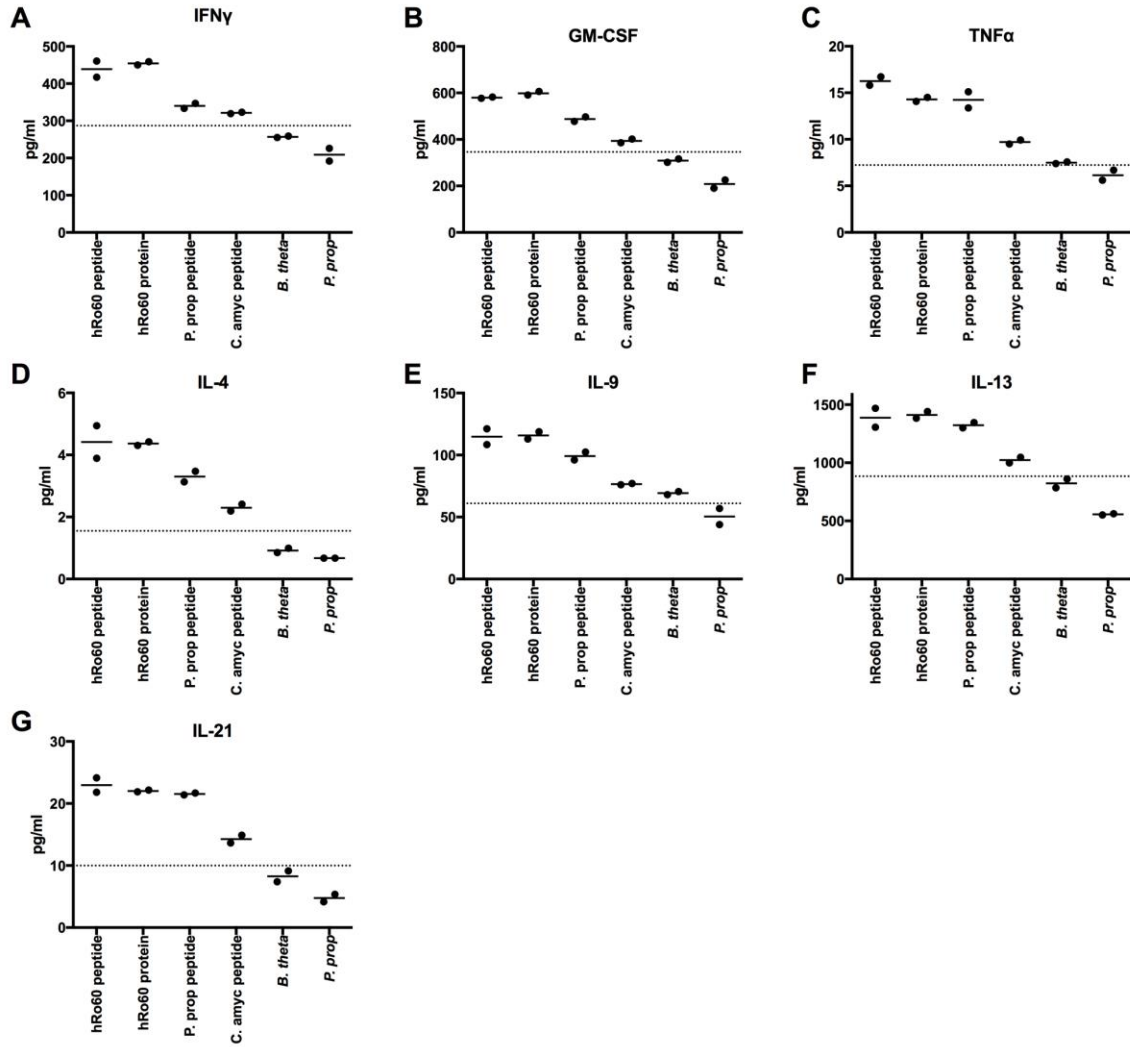

**Fig. S7.** Cytokine concentrations (pg/ml) of supernatants from the cross-reactive T cell clone from Fig. 5 measured using a bead-based immunoassay. Monocyte control baseline is shown as a dotted line in each graph.



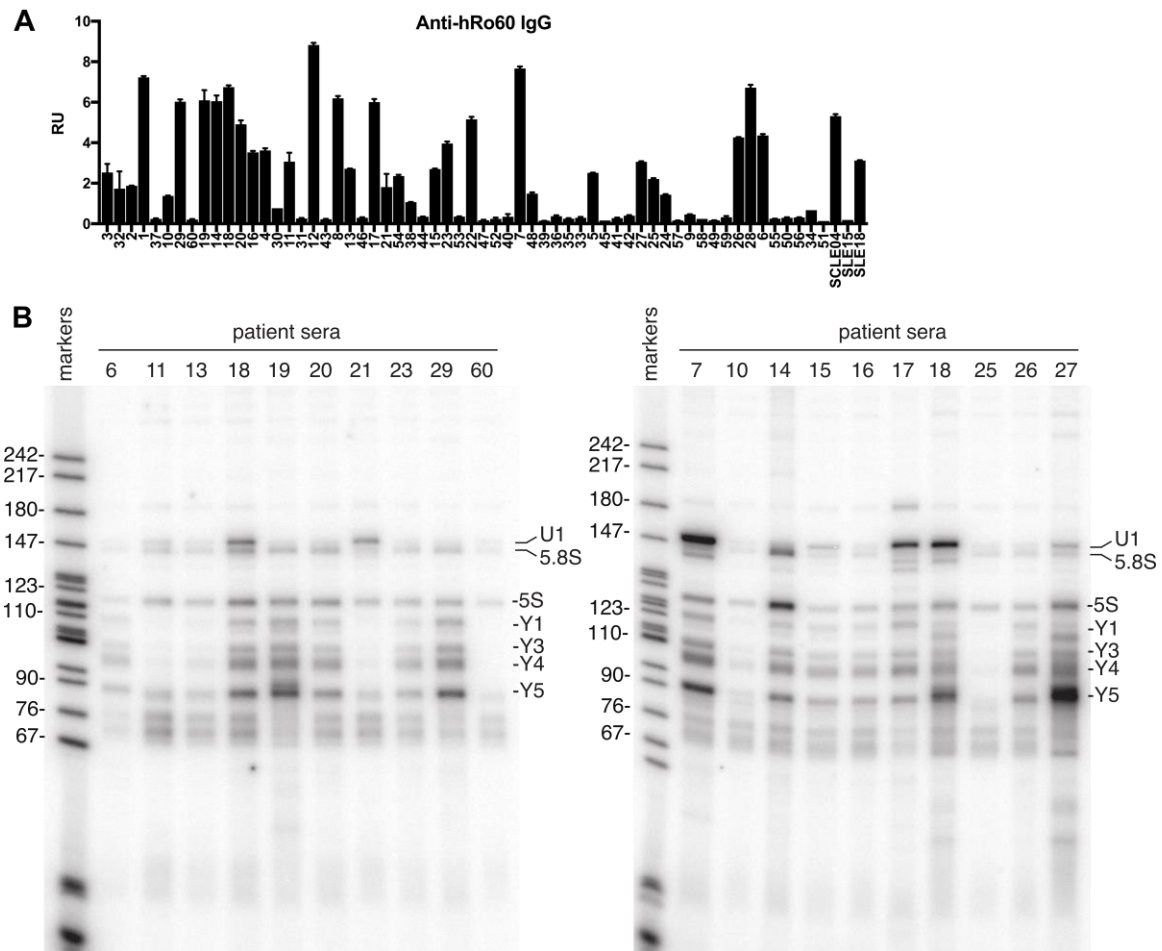

**Fig. S8. Anti-Ro60 antibody status of Harvard cohort lupus subjects.** (A) ELISA of anti-human Ro60 IgG autoantibodies using Harvard lupus sera, listed by identification number. Relative units (RU) shown on y-axis. (B) Immunoprecipitation of human Ro60-Y RNA complexes from HEK293T cell lysate using Harvard lupus sera (as described in Fig. S2).

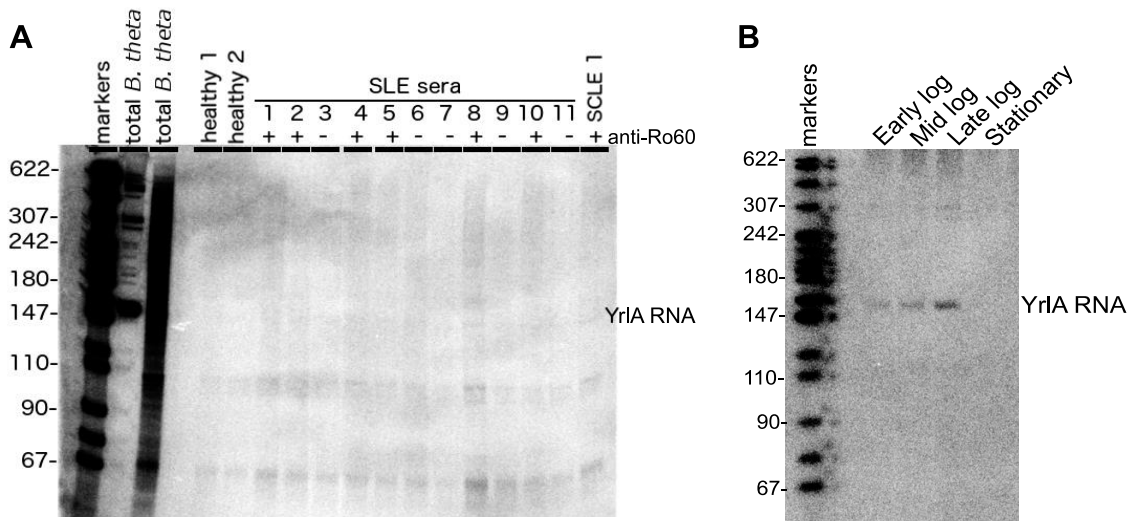

**Fig. S9. YrIA RNA is not detected in immunoprecipitates from *B. theta* using human lupus sera.** (A) Human lupus sera did not immunoprecipitate YrIA RNA-containing RNPs from *B. theta* lysates. First lane, molecular size markers (nt). Total *B. theta*, total RNA extracted directly from the input cells (first total lane) or from the subsequent lysate (second total lane). The degradation of rRNAs in the lysate resulted in significant background hybridization. The RNAs present in immunoprecipitates using sera from healthy donors are shown in the next two lanes. Eleven SLE sera and one SCLE serum are labeled with + or – representing the anti-Ro60 IgG antibody status by ELISA. (B) The presence of YrIA in RNA extracted from *B. theta* cells was detected by Northern blotting using a <sup>32</sup>P-labeled full-length probe. First lane, molecular markers (nt). Early log, *B. theta* grown to an optical density at 600 nm (OD<sub>600</sub>) of 0.7. Mid log, whole *B. theta* lysates at OD<sub>600</sub> of 1.2. Late log, whole *B. theta* lysates at OD<sub>600</sub> of 1.8. Stationary, whole *B. theta* lysates collected 24 hours after maximum OD<sub>600</sub> (~2.2) was reached.

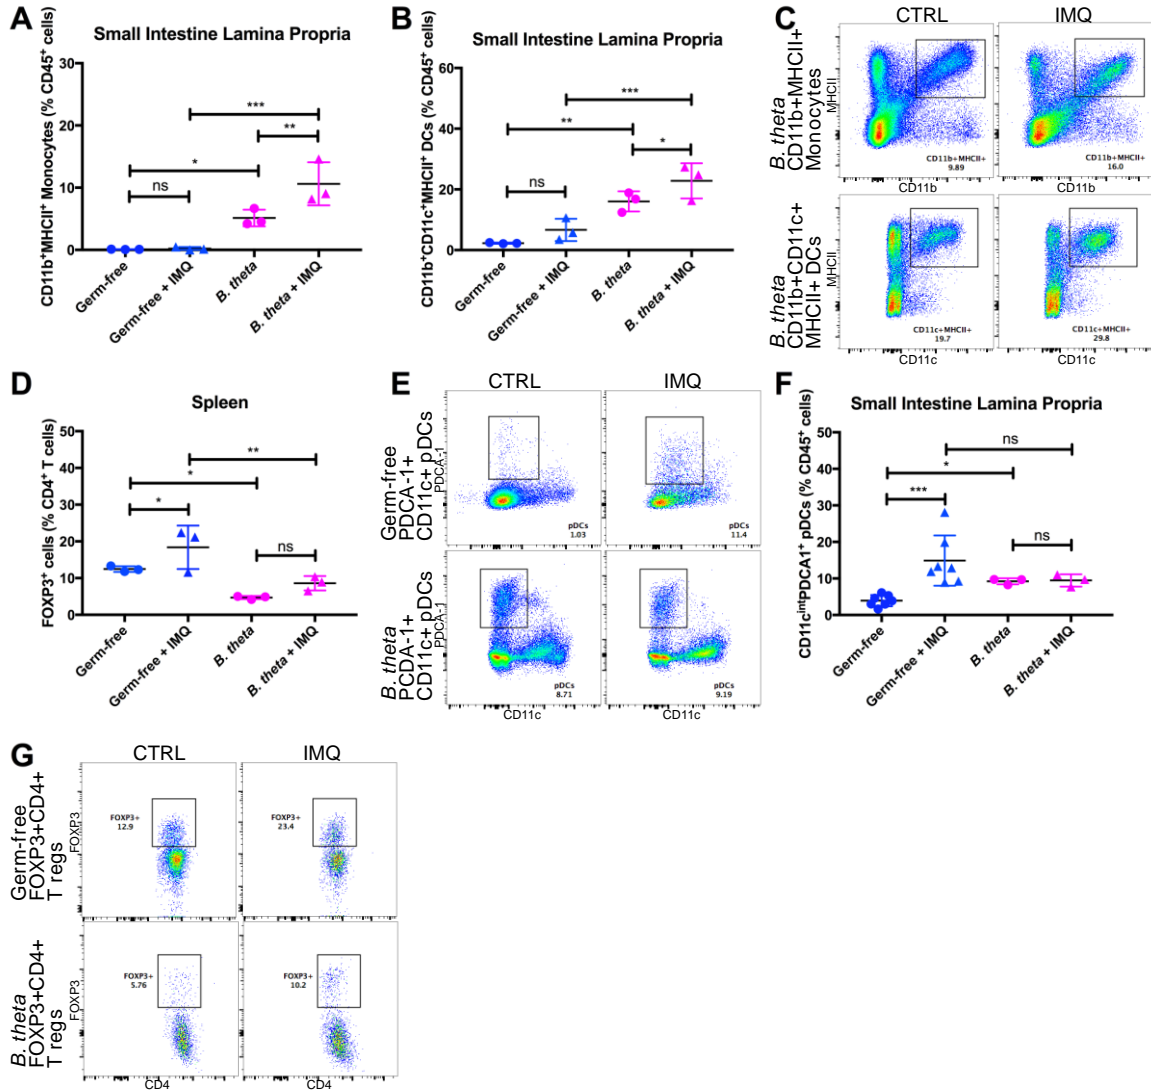

**Fig. S10. *B. theta* monocolonization of GF mice induces gut and systemic immune changes.** (A) FACS analysis of small intestine lamina propria (SI-LP) CD11b<sup>+</sup>MHCII<sup>+</sup> monocytes and (B) CD11b<sup>+</sup>CD11c<sup>+</sup>MHCII<sup>+</sup> dendritic cells (DCs) compared to GF age- and sex-matched control mice. Mice received imiquimod (IMQ) topically 3 times per week for a total of 8 weeks to induce a SLE-like phenotype. Each dot represents one mouse, n = 3 mice per group. Black bars indicate significance by t-test; ns, not significant, \*p<0.05, \*\*p<0.01, \*\*\*p<0.001. (C) Representative plots of CD11b<sup>+</sup>MHCII<sup>+</sup> monocytes and CD11b<sup>+</sup>CD11c<sup>+</sup>MHCII<sup>+</sup> DCs in SI-LP. (D) *B. theta* monocolonization of GF mice increases gut plasmacytoid dendritic cells (pDCs). FACS analysis of SI-LP CD11c<sup>int</sup>PDCA-1<sup>+</sup> pDCs compared to GF age- and sex-matched control mice. Each dot represents one mouse, n = 3 mice per group. Black bars indicate significance by t-test. (E) Representative plots of CD11c<sup>int</sup>PDCA-1<sup>+</sup> pDCs in SI-LP. (F) FACS analysis of spleen FOXP3<sup>+</sup> T cells. Each dot represents one mouse, n = 7 in each GF group, n = 3 in each *B. theta* group. Black bars indicate significance by t-test. (G) Representative plots of FOXP3<sup>+</sup> T cells in spleen.

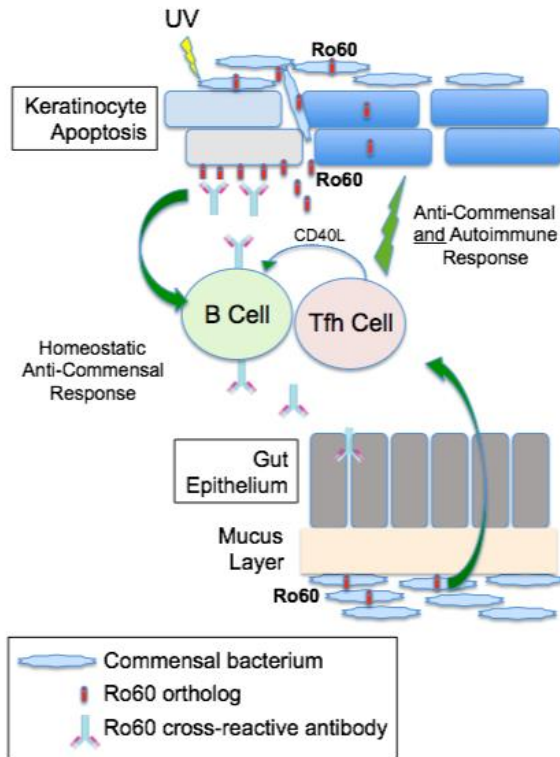

**Fig. S11. Schematic of proposed mechanism of how Ro60 bacteria trigger and sustain autoimmunity.** Human commensal Ro60 orthologs could drive both cutaneous and systemic lupus erythematosus. The cartoon shows the skin and gut barrier epithelia colonized by commensal bacteria containing Ro60 orthologs (red barrels). Besides homeostatic responses of the innate and adaptive immune system to commensal bacteria at these barrier sites, breach of the epithelial barriers, for example during keratinocyte apoptosis after ultraviolet light exposure (yellow lightning bolt) or gut mucosal irritation by dietary or environmental factors, leads to Ro60 ortholog antigen presentation to T follicular helper cells (Tfh) and activation of B cells by Ro60 and co-stimulation (e.g., CD40 ligand, CD40L) provided by Tfh. These events result in the production of anti-Ro60 antibodies and T cells cross-reactive (green lightning bolt) to both human and bacterial Ro60 due to the high sequence similarity at autoepitopes followed by subsequent tissue damage. Cross-reactive antibodies could thus drive both anti-commensal and autoimmune responses in genetically predisposed individuals.

**Table S1. Commensal bacterial Ro60 orthologs identified by in silico methods.\***

| Phylum         | Species                                                 | Genebank Accession no. | Locus Tag        | Length | Commensal Niche   | Genome sequence Genebank Accession no. | Ro60 Coordinate |         |        | Distance between Ro60 and Yr1A | Putative Yr1A Coordinate |         |        | E-value  |
|----------------|---------------------------------------------------------|------------------------|------------------|--------|-------------------|----------------------------------------|-----------------|---------|--------|--------------------------------|--------------------------|---------|--------|----------|
|                |                                                         |                        |                  |        |                   |                                        | from            | to      | strand |                                | from                     | to      | strand |          |
| Actinobacteria | Actinomyces massiliensis F0489                          | EJF36407.1             | HMPREF1318_2237  | 529    | Oral              | <a href="#">AKFT01000221.1</a>         | 20694           | 22283   | +      | 447                            | 20114                    | 20247   | +      | 6.60E-11 |
|                | Actinomyces sp. Oral taxon 414                          | ALC98376.1             | AM609_00765      | 528    | Oral              | <a href="#">CP012590.1</a>             | 203197          | 204783  | +      |                                |                          |         |        |          |
|                | Corynebacterium amycolatum SK46                         | EEB62751.1             | CORAM0001_1910   | 544    | Skin              | <a href="#">ABZU01000011.1</a>         | 51027           | 52661   | +      |                                |                          |         |        |          |
|                | Mycobacterium smegmatis (strain ATCC 700084 / mc(2)155) | ABK75237.1             | MSMEG_1193       | 564    | Urogenital        | <a href="#">CP000480.1</a>             | 1259580         | 1261274 | +      | 164                            | 1259281                  | 1259416 | +      | 3.70E-18 |
|                | Parascardovia denticolens IPLA 20019                    | EIT87591.1             | A200_07914       | 472    | Oral, breast milk | <a href="#">AKII01000025.1</a>         | 49615           | 51033   | -      | 2062                           | 53276                    | 53095   | -      | 0.00082  |
|                |                                                         |                        |                  |        |                   |                                        |                 |         |        | 1271                           | 52428                    | 52304   | -      | 0.0028   |
|                | Propionibacterium prop F0230a                           | AFN45864.1             | HMPREF9154_0590  | 534    | Oral              | <a href="#">CP002734.1</a>             | 618204          | 619808  | +      | 17                             | 618059                   | 618187  | +      | 3.40E-10 |
|                | Segniliparus rugosus ATCC BAA-974                       | EFV12828.2             | HMPREF9336_02315 | 538    | Airway            | <a href="#">ACZI02000002.1</a>         | 656886          | 658502  | +      | 518                            | 656228                   | 656368  | +      | 2.80E-10 |
|                | Streptomyces sp. HGB0020                                | EPD57925.1             | HMPREF1211_06263 | 527    | GI                | <a href="#">AGER01000027.1</a>         | 358449          | 360032  | +      | 199                            | 358113                   | 358250  | +      | 5.20E-11 |
| Bacteroidetes  | Bacteroides theta 7330                                  | ALJ40817.1             | Btheta7330_01248 | 504    | Gut               | <a href="#">CP012937.1</a>             | 1628304         | 1629818 | +      | 47                             | 1629865                  | 1630002 | +      | 6.20E-07 |
|                | Chryseobacterium                                        | EFK36987.1             | HMPREF0204_10833 | 505    | Urogenital        | <a href="#">ACKQ02000003.1</a>         | 6745            | 8262    | -      | 2293                           | 4317                     | 4452    | -      | 4.00E-   |

|                            |                                                  |            |                  |     |                |                                 |       |       |   |      |       |       |   |          |    |
|----------------------------|--------------------------------------------------|------------|------------------|-----|----------------|---------------------------------|-------|-------|---|------|-------|-------|---|----------|----|
|                            | gleum ATCC 35910                                 |            |                  |     |                |                                 |       |       |   |      |       |       |   |          | 08 |
|                            | Prevotella sp. CAG:1092                          | CCZ13284.1 | BN465_02442      | 570 | Gut            | <a href="#">CAZL010000441.1</a> | 26326 | 28038 | + |      |       |       |   |          |    |
| <b>Firmicutes</b>          | Clostridium sp. BL8                              | EQB87098.1 | M918_10850       | 487 | Gut            | <a href="#">AUPA01000204.1</a>  | 6895  | 8358  | + | 254  | 6505  | 6641  | + | 1.20E-07 |    |
|                            | Paenibacillus sp. HGF7                           | EGL16326.1 | HMPREF9413_2200  | 501 | Gut            | <a href="#">AFDH01000102.1</a>  | 40356 | 41861 | + | 282  | 39937 | 40074 | + | 4.40E-13 |    |
|                            | Paenibacillus sp. HGH0039                        | EPD88908.1 | HMPREF1207_01859 | 501 | GI             | <a href="#">AGEN01000024.1</a>  | 53351 | 54856 | - | 282  | 55275 | 55138 | - | 4.40E-13 |    |
| <b>beta-Proteobacteria</b> | Eikenella corrodens ATCC 23834                   | EEG25246.1 | EIKCOROL_00065   | 522 | Oral           | <a href="#">ACEA01000002.1</a>  | 41672 | 43240 | + | 1402 | 40137 | 40270 | + | 4.70E-14 |    |
|                            |                                                  |            |                  |     |                |                                 |       |       |   | 1162 | 40391 | 40510 | + | 2.50E-08 |    |
|                            | Kingella oralis ATCC 51147                       | EEP66649.1 | GCWU000324_03050 | 524 | Oral           | <a href="#">ACJW02000008.1</a>  | 80514 | 82088 | - | 1413 | 83501 | 83634 | - | 8.90E-11 |    |
|                            |                                                  |            |                  |     |                |                                 |       |       |   | 1132 | 83220 | 83353 | - | 4.60E-08 |    |
|                            | Neisseria elongata subsp. glycolytica ATCC 29315 | EFE48372.1 | NEIELOOT_02899   | 521 | Nasopharyngeal | <a href="#">ADBF01000255.1</a>  | 30060 | 31625 | - | 998  | 32623 | 32765 | - | 1.40E-12 |    |
|                            |                                                  |            |                  |     |                |                                 |       |       |   | 203  | 31828 | 31951 | - | 2.40E-11 |    |
|                            |                                                  |            |                  |     |                |                                 |       |       |   | 351  | 31976 | 32115 | - | 5.30E-09 |    |
|                            |                                                  |            |                  |     |                |                                 |       |       |   | 766  | 32391 | 32510 | - | 4.50E-07 |    |
|                            | Neisseria flavescens strain CD-NF1               | KZC75466.1 | TV01_0020        | 524 | Skin           | <a href="#">LAEH01000038.1</a>  | 8407  | 9981  | - | 239  | 10362 | 10220 | - | 3.90E-14 |    |

|  |                                         |                            |                  |     |                |                                |        |        |   |      |        |        |   |          |
|--|-----------------------------------------|----------------------------|------------------|-----|----------------|--------------------------------|--------|--------|---|------|--------|--------|---|----------|
|  |                                         |                            |                  |     |                |                                |        |        |   |      | 10656  | 10516  | - | 3.10E-09 |
|  | Neisseria macacae ATCC 33926            | <a href="#">EGQ76909.1</a> | HMPREF9418_1500  | 524 | Gut            | <a href="#">AFQE01000071.1</a> | 5272   | 6846   | - | 1623 | 8469   | 8612   | - | 1.60E-13 |
|  |                                         |                            |                  |     |                |                                |        |        |   | 1384 | 8230   | 8352   | - | 4.50E-07 |
|  |                                         |                            |                  |     |                |                                |        |        |   | 260  | 7106   | 7238   | - | 4.60E-06 |
|  | Neisseria mucosa strain C6A             | KGJ32323.1                 | ES17_04055       | 524 | Nasopharyngeal | <a href="#">JQHF01000006.1</a> | 64599  | 66173  | + | 246  | 64217  | 64353  | + | 4.20E-16 |
|  |                                         |                            |                  |     |                |                                |        |        |   | 533  | 63926  | 64066  | + | 1.50E-09 |
|  | Neisseria shayeganii 871                | <a href="#">EGY53080.1</a> | HMPREF9371_0707  | 545 | Airway         | <a href="#">AGAY01000023.1</a> | 12515  | 14152  | - | 265  | 14417  | 14562  | - | 1.50E-11 |
|  |                                         |                            |                  |     |                |                                |        |        |   | 85   | 14237  | 14348  | - | 1.30E-06 |
|  | Neisseria sicca ATCC 29256              | EET43536.1                 | NEISICOT_02760   | 523 | Nasopharyngeal | <a href="#">ACKO02000019.1</a> | 47989  | 49560  | + | 1263 | 46586  | 46726  | + | 8.50E-14 |
|  |                                         |                            |                  |     |                |                                |        |        |   | 1022 | 46845  | 46967  | + | 3.90E-07 |
|  | Neisseria sp. GT4A_CT1                  | EGY60774.1                 | HMPREF1028_01178 | 521 | Oral           | <a href="#">ACWS01000057.1</a> | 17480  | 19045  | + | 264  | 17073  | 17216  | + | 2.80E-14 |
|  | Neisseria sp. oral taxon 020 str. F0370 | EKY03172.1                 | HMPREF9120_02756 | 522 | Oral           | <a href="#">AMER01000212.1</a> | 8150   | 9718   | + | 206  | 7810   | 7944   | + | 7.20E-15 |
|  |                                         |                            |                  |     |                |                                |        |        |   | 344  | 7670   | 7806   | + | 8.80E-10 |
|  | Neisseria subflava NJ9703               | EFC52289.1                 | NEISUBOT_04391   | 524 | Oral           | <a href="#">ACEO02000005.1</a> | 134838 | 136412 | - | 239  | 136651 | 136793 | - | 1.90E-15 |

|                             |                                |            |                  |               |      |                                |      |      |   |     |        |        |   |          |
|-----------------------------|--------------------------------|------------|------------------|---------------|------|--------------------------------|------|------|---|-----|--------|--------|---|----------|
|                             |                                |            |                  |               |      |                                |      |      |   | 534 | 136946 | 137086 | - | 1.30E-10 |
| <b>gamma-Proteobacteria</b> | Cardiobacterium valvarum F0432 | EHM52985.1 | HMPREF9080_02018 | 306 (partial) | Oral | <a href="#">AGCM01000115.1</a> | <1   | 919  | - | 364 | 1418   | 1283   | - | 3.10E-14 |
|                             |                                |            |                  |               |      |                                |      |      |   | 525 | 1571   | 1444   | - | 1.20E-08 |
|                             |                                |            |                  |               |      |                                |      |      |   | 200 | 1255   | 1119   | - | 8.40E-08 |
| <b>Synergistes</b>          | Synergistes sp. 3_1_syn1       | EHL69418.1 | HMPREF1006_01942 | 511           | Gut  | <a href="#">ACUH01000014.1</a> | 3108 | 4643 | - |     |        |        |   |          |

\*Ro60 orthologs were identified in GenBank and cross-referenced with public databases from the Pathosystems Resource Integration Center (PATRIC) and the Human Microbiome Project to identify human commensal species. Bacterial genomes were searched for the presence of YrlA RNA as described (12).



**Table S2. Lupus study subject clinical data.\***

| Subject                    | SLE01   | SLE02        | SLE03        | SLE04                         | SLE05        | SLE06        | SLE07   | SLE08        | SLE09   |
|----------------------------|---------|--------------|--------------|-------------------------------|--------------|--------------|---------|--------------|---------|
| Number visits completed    | 3       | 3            | 3            | 3                             | 3            | 2            | 3       | 1            | 1       |
| Age                        | 40      | 47           | 49           | 29                            | 49           | 40           | 31      | 52           | 34      |
| Sex                        | F       | F            | F            | F                             | F            | F            | F       | F            | F       |
| Race                       | White   | White        | Black        | Black, American Indian, White | White        | Black        | White   | Black        | White   |
| Ethnicity                  | Latina  | Not Hispanic | Not Hispanic | Not Hispanic                  | Not Hispanic | Not Hispanic | Latina  | Not Hispanic | Latina  |
| Weight (kg)                | 59      | 87.5         | 62.6         | 47.6                          | 72.6         | 65.3         | 87.1    | 54.4         | 68.6    |
| Height (inches)            | 62.75   | 62           | 64.75        | 66.5                          | 66.5         | 59           | 65      | 63           | 60.5    |
| BMI                        | 23.2    | 35.3         | 23.1         | 16.7                          | 24.4         | 29.1         | 31.9    | 21.3         | 29.5    |
| Lupus Diagnosis            | SLE     | SLE          | SLE          | SLE                           | SLE          | SLE          | SLE     | SLE          | SLE     |
| Other autoimmune diagnoses | MCTD    | Sjogren's    | MCTD         | Sjogren's, MCTD               | None         | DLE          | None    | None         | None    |
| Year of diagnosis          | 2003    | 1984         | 1985         | 2006                          | 2013         | 1997         | 2014    | unknown      | 2011    |
| ANA                        | P       | P            | P            | P                             | P            | P            | P       | P            | P       |
| Ro/SSA                     | P       | P            | P            | P                             | P            | N            | N       | P            | N       |
| La/SSB                     | P       | N            | N            | N                             | N            | N            | N       | P            | N       |
| dsDNA                      | P       | P            | N            | P                             | P            | P            | N       | N            | N       |
| Sm/U1RNP                   | P       | P            | P            | P                             | N            | P            | N       | -            | N       |
| WBC (1000 cells/ml)        | 10.7    | 9.6          | 3.0          | 3.8                           | 3.8          | 2.7          | 7.5     | 5.6          | 6.7     |
| Hemoglobin (g/dl)          | 13.5    | 11.8         | 11.8         | 12.8                          | 13.2         | 12.4         | 12.8    | 12.5         | 14      |
| Platelets (cells/ml)       | 185,000 | 207,000      | 165,000      | 194,000                       | 274,000      | 98,000       | 376,000 | 135,000      | 234,000 |
| Creatinine (mg/dl)         | 0.6     | 2.4          | 0.7          | 0.6                           | 0.7          | 1            | 0.5     | 0.8          | 0.76    |
| CRP (mg/l)                 | 6.6     | 8.0          | 0.4          | -                             | -            | 0.5          | 7.3     | 1.1          | 0.5     |
| C3 (mg/dl)                 | 72      | 109          | 97           | 95                            | 86           | 69           | 109     | 122          | 88      |



|                                 |                                     |                                                                    |                                                     |                                                                   |                               |                                           |                                                      |                                                 |                                                           |
|---------------------------------|-------------------------------------|--------------------------------------------------------------------|-----------------------------------------------------|-------------------------------------------------------------------|-------------------------------|-------------------------------------------|------------------------------------------------------|-------------------------------------------------|-----------------------------------------------------------|
| HLA DR15 (PCR)                  | N                                   | N                                                                  | N                                                   | N                                                                 | P                             | P                                         | N                                                    | N                                               | N                                                         |
| HLA DR53 (PCR)                  | P                                   | N                                                                  | P                                                   | N                                                                 | N                             | N                                         | N                                                    | P                                               | N                                                         |
| <b>VISIT 1</b>                  | <b>Y</b>                            | <b>Y</b>                                                           | <b>Y</b>                                            | <b>Y</b>                                                          | <b>Y</b>                      | <b>Y</b>                                  | <b>Y</b>                                             | <b>Y</b>                                        | <b>Y</b>                                                  |
| Hydroxychloroquine              | N                                   | N                                                                  | 200 mg daily                                        | discontinued against medical advice 2 months prior to first visit | 200 mg twice daily            | 200 mg twice daily                        | 200 mg twice daily                                   | 200 mg twice daily                              | 200 mg twice daily                                        |
| Immunomodulatory medications    | Azathioprine 50 mg twice daily      | Rituximab 1 month prior to first visit                             | Mycophenolate mofetil 750 mg twice daily            | discontinued against medical advice 1 month prior to first visit  | N                             | Mycophenolate mofetil 1500 mg twice daily | N                                                    | N                                               | N                                                         |
| Prednisone                      | N                                   | 5 mg daily                                                         | 7.5 mg daily                                        | discontinued against medical advice 1 month prior to first visit  | 1 mg daily                    | 5 mg daily                                | tapered off 1 month prior to first visit             | N                                               | N                                                         |
| Analgesics                      | Naproxen                            | Acetaminophen                                                      | N                                                   | N                                                                 | Aspirin, naproxen             | N                                         | N                                                    | N                                               | N                                                         |
| Anticoagulants                  | N                                   | N                                                                  | N                                                   | N                                                                 | N                             | Warfarin                                  | Warfarin                                             | N                                               | N                                                         |
| Antihypertensives               | N                                   | Metoprolol, enalapril                                              | Lisinopril                                          | N                                                                 | N                             | Carvedilol, losartan                      | N                                                    | N                                               | N                                                         |
| Proton pump inhibitor           | Pantoprazole                        | Esomeprazole                                                       | Esomeprazole                                        | N                                                                 | N                             | N                                         | N                                                    | N                                               | N                                                         |
| Other prescription medications  | Valacyclovir                        | Diazepam, nortriptyline, prochlorperazin, sumatriptan, venlafaxine | Simvastatin                                         | N                                                                 | N                             | Simvastatin, hydroxyzine                  | N                                                    | N                                               | N                                                         |
| Vitamins, minerals, supplements | N                                   | B-complex vitamin, vitamin D3, cranberry, iron, thiamine           | Calcium, iron, multivitamin, biotin, black seed oil | N                                                                 | Multivitamin, fish oil        | Multivitamin, folic acid                  | Iron                                                 | N                                               | Vitamin C, vitamin B12, iron                              |
| Topical medications             | N                                   | Ciclopirox solution to left great toenail                          | N                                                   | N                                                                 | N                             | Clobetasol                                | N                                                    | N                                               | N                                                         |
| Breakfast                       | Coffee, bite of turkey egg sandwich | Raisin bagel, coffee                                               | Orange                                              | None                                                              | Toast with butter, egg, bacon | Oatmeal, hashbrowns, coffee               | Corn muffin with butter, coffee with sugar and cream | Grits, whole milk, butter, coffee, cream, sugar | Oatmeal maple brown sugar, powdered peanut butter, coffee |

|                                       |               |                                                          |                                 |                                             |                                                                                                     |                                                                                               |                                                            |                                                |                                                                        |
|---------------------------------------|---------------|----------------------------------------------------------|---------------------------------|---------------------------------------------|-----------------------------------------------------------------------------------------------------|-----------------------------------------------------------------------------------------------|------------------------------------------------------------|------------------------------------------------|------------------------------------------------------------------------|
|                                       |               |                                                          |                                 |                                             |                                                                                                     |                                                                                               |                                                            |                                                | with cream and Coffee Mate caramel flavor                              |
| Lunch                                 | Chicken wings | None                                                     | Gritts, eggs, bacon, sausage    | Rice and peas with roasted chicken and pork | Apple, pasta with tomato sauce and parmesan                                                         | Package of cheese and crackers, flavored water                                                | Rice, beans, chicken, tortilla, mild sauce, avocado, Pepsi | Popcorn, salt, butter                          | Strawberry yogurt, plum                                                |
| Dinner                                | None          | Beef and dumpling stew                                   | Fried fish, hush puppies, salad | None                                        | Turkey, stuffing, potatoes, asparagus, apple cider                                                  | Chicken wings, half cheeseburger, potato chips                                                | Pepperoni and cheese pizza, carbonated soft drink          | Steamed broccoli, cauliflower, carrots, butter | Chinese rice, chicken, crab rangoon, watermelon, pineapple, cantaloupe |
| Major dietary changes in last 2 weeks | N             | N                                                        | N                               | N                                           | Usually vegetarian based diet, had meat twice in last day                                           | N                                                                                             | N                                                          | N                                              | N                                                                      |
| Bristol stool scale                   | type 1        | type 2                                                   | type 3                          | type 3                                      | type 3                                                                                              | type 3                                                                                        | type 3                                                     | Not recorded                                   | type 4                                                                 |
| <b>VISIT 2</b>                        | Y             | Y                                                        | Y                               | Y                                           | Y                                                                                                   | Y                                                                                             | Y                                                          | Y                                              | N                                                                      |
| Change in health                      | N             | N                                                        | N                               | N                                           | N                                                                                                   | N                                                                                             | Pregnant                                                   |                                                |                                                                        |
| Protocol deviations                   | N             | N                                                        | N                               | N                                           | N                                                                                                   | N                                                                                             | N                                                          | Took antibiotics, cancelled visit              |                                                                        |
| Change in medication                  | N             | N                                                        | N                               | N                                           | Prednisone decreased to 0.5 mg daily                                                                | N                                                                                             | Stopped warfarin, started rivaroxaban                      |                                                |                                                                        |
| Changes in diet                       | N             | N                                                        | N                               | N                                           | N                                                                                                   | N                                                                                             | N                                                          |                                                |                                                                        |
| Breakfast                             | Coffee        | Coffee with cream and Equal, raisin bagel with margarine | None                            | None                                        | Whole grain toast, cereal, fried egg, tea, honey, milk                                              | Hash browns, coffee with cream and sugar                                                      | Belvita biscuits, coffee, light cream, sugar               |                                                |                                                                        |
| Lunch                                 | Granola bar   | None                                                     | Crackers and cheese             | Turkey sandwich, grape juice                | Chickpea stew with tomatoes and basmati rice, baked butternut squash with apples and raisins, decaf | Sandwich of turkey, lettuce, tomato, salt, pepper, oil, vinegar, mayonnaise, onions, american | Chicken nuggets, french fries, ginger ale                  |                                                |                                                                        |

|                      |                                                                                        |                                        |                                                                              |                                                            |                                                                                                |                                  |                                                                                          |   |   |
|----------------------|----------------------------------------------------------------------------------------|----------------------------------------|------------------------------------------------------------------------------|------------------------------------------------------------|------------------------------------------------------------------------------------------------|----------------------------------|------------------------------------------------------------------------------------------|---|---|
|                      |                                                                                        |                                        |                                                                              |                                                            | coffee, half and half, sugar                                                                   | cheese, hardroll; flavored water |                                                                                          |   |   |
| Dinner               | Rice, beef, cauliflower with white sauce                                               | Baked chicken                          | Baked macaroni and cheese, stewed pig feet, mixed collard greens, ginger ale | Fried popcorn chicken, Pepsi                               | Corn chips, hummus, sesame seeds, olives, apple cider herb tea, biscuit cracker with chocolate | Cake and ice cream               | Mashed potatoes with butter and milk, boneless pork rib, cranberry peach soda            |   |   |
| Bristol stool scale  | type 1                                                                                 | type 6                                 | type 3                                                                       | type 1                                                     | type 4                                                                                         | not received                     | type 1                                                                                   |   |   |
| <b>VISIT 3</b>       | Y                                                                                      | Y                                      | Y                                                                            | Y                                                          | Y                                                                                              | N                                | Y                                                                                        | N | N |
| Change in health     | N                                                                                      | Pleurisy                               | N                                                                            | N                                                          | N                                                                                              |                                  | Pregnant, thrombophilia                                                                  |   |   |
| Protocol deviations  | N                                                                                      | N                                      | N                                                                            | N                                                          | N                                                                                              |                                  | N                                                                                        |   |   |
| Change in medication | N                                                                                      | Prednisone 5 mg twice daily for 4 days | N                                                                            | Started acetaminophen/oxycodone as needed for pain         | Stopped prednisone                                                                             |                                  | Stopped rivaroxaban, started enoxaparin, hydroxychloroquine, prenatal vitamin, vitamin D |   |   |
| Changes in diet      | Added protein shakes, changed from white bread to wheat, smaller portions and exercise | Phosphate restriction                  | N                                                                            | N                                                          | N                                                                                              |                                  | N                                                                                        |   |   |
| Breakfast            | White bread with cream cheese, orange juice, coffee with milk and sugar                | Coffee, cream, aspartame sweetener     | Grits, eggs, bacon, flavored water                                           | Ginger ale                                                 | 2 banana oatmeal cookies, black tea with milk and maple syrup                                  |                                  | Banana, biscuit, coffee, cream, sugar                                                    |   |   |
| Lunch                | Grilled chicken, brown rice, corn, peas, broccoli                                      | None                                   | Potato chips, cheese-flavored crackers                                       | Cheese grits, chocolate chip cookies, Min Maid fruit punch | Drunken noodles with chicken, peppers, onions, broccoli                                        |                                  | White rice, grilled chicken, pineapple, soy sauce, ginger ale                            |   |   |

|                     |                                                                         |                                                                |                                           |                                                                                 |                                                                                                                    |  |                       |  |  |
|---------------------|-------------------------------------------------------------------------|----------------------------------------------------------------|-------------------------------------------|---------------------------------------------------------------------------------|--------------------------------------------------------------------------------------------------------------------|--|-----------------------|--|--|
| Dinner              | Beef with onions and mushrooms, white rice, salad with red wine vinegar | Bagel with butter, American cheese, Egg Beaters, butter, bread | Lasagne, bread, flavored, Adirondack soda | Ice cream dulce de leche, Slim Jims, cheese and crackers, C&C black cherry soda | Cottage cheese with pineapple, fritata with kale, chard, sweet potato, herbal tea; snack of banana oatmeal cookies |  | Yogurt, string cheese |  |  |
| Bristol stool scale | type 4                                                                  | not received                                                   | type 1                                    | not received                                                                    | not recorded                                                                                                       |  | type 2                |  |  |

\*Abbreviations: F, female; BMI, body mass index, SLE, systemic lupus erythematosus; SCLE, subacute lupus erythematosus; DLE, discoid lupus erythematosus; MCTD, mixed connective tissue disease; PBC, primary biliary cirrhosis; P, positive; N, negative/no; Y, yes; -, not available; RU, relative units.

**Table S2. Lupus study subject clinical data. continued\***

| Subject                    | SLE10        | SLE11        | SLE12        | SLE13        | SLE14        | SLE15                      | SLE18        | SCLE01                   | SCLE04       |
|----------------------------|--------------|--------------|--------------|--------------|--------------|----------------------------|--------------|--------------------------|--------------|
| Number visits completed    | 3            | 3            | 3            | 1            | 3            | 3                          | 2            | 1                        | 2            |
| Age                        | 48           | 31           | 54           | 26           | 32           | 44                         | 33           | 75                       | 72           |
| Sex                        | F            | F            | F            | F            | F            | F                          | F            | F                        | M            |
| Race                       | White        | White        | Black        | Black        | Black        | Portuguese/Native American | Black        | White                    | White        |
| Ethnicity                  | Not Hispanic | Hispanic                   | Not Hispanic | Not Hispanic             | Not Hispanic |
| Weight (kg)                | 52.8         | 69.6         | 72           | 63.6         | 85.7         | 87.8                       | 95.3         | 51.7                     | 81.4         |
| Height (inches)            | 68.5         | 67           | 62.75        | 62.5         | 64           | 59.25                      | 63.5         | 64                       | 65           |
| BMI                        | 17.4         | 24.0         | 28.3         | 25.2         | 32.4         | 38.8                       | 36.5         | 19.6                     | 29.8         |
| Lupus Diagnosis            | SLE          | SLE          | DLE          | SLE          | SLE          | SLE/Discoid Lupus          | SLE          | SCLE                     | SCLE         |
| Other autoimmune diagnoses | None         | None         | None         | Sjogren's    | None         | None                       | None         | PBC/autoimmune hepatitis | None         |
| Year of diagnosis          | 1982         | 2015         | 1990         | 2015         | 2016         | 1993                       | 2012         | unknown                  | ~1997        |
| ANA                        | P            | P            | N            | P            | P            | P                          | P            | N                        | P            |
| Ro/SSA                     | -            | N            | -            | P            | N            | P                          | P            | P                        | Y            |
| La/SSB                     | -            | N            | -            | 4.1          | N            | N                          | P            | N                        | N            |

|                                      |                                                 |                                                   |                  |                                                                     |         |                                                |                            |                                    |                                |
|--------------------------------------|-------------------------------------------------|---------------------------------------------------|------------------|---------------------------------------------------------------------|---------|------------------------------------------------|----------------------------|------------------------------------|--------------------------------|
| dsDNA                                | -                                               | P                                                 | -                | Y                                                                   | N       | P                                              | P                          | -                                  | -                              |
| Sm/U1RNP                             | -                                               | N                                                 | -                | -                                                                   | P       | -                                              | P                          | -                                  | -                              |
| WBC (1000 cells/ml)                  | 11.6                                            | 4.1                                               | 4.9              | 11.5                                                                | -       | 6.8                                            | 4.2                        | 4.9                                | 4.5                            |
| Hemoglobin (g/dl)                    | 11.4                                            | 12.2                                              | 12.7             | 9.1                                                                 | -       | 13                                             | 12.2                       | 12.5                               | 12.6                           |
| Platelets (cells/ml)                 | 158,000                                         | 218,000                                           | 168,000          | 351,000                                                             | -       | 237,000                                        | 229,000                    | 205,000                            | 37,400                         |
| Creatinine (mg/dl)                   | 0.95                                            | 1.0                                               | 0.6              | 1                                                                   | -       | 0.9                                            | 0.74                       | 0.8                                | 1.37                           |
| CRP (mg/l)                           | 3.37                                            | <0.1                                              | -                | 2.7                                                                 | -       | 10.9                                           | 5.1                        | -                                  | -                              |
| C3 (mg/dl)                           | 114                                             | 84                                                | -                | 58                                                                  | -       | 151                                            | 132                        | -                                  | -                              |
| C4 (mg/dl)                           | 24                                              | 12                                                | -                | 7                                                                   | -       | 42                                             | 29                         | -                                  | -                              |
| Flare                                | N                                               | N                                                 | N                | Y                                                                   | N       | N                                              | -                          | Y                                  | Y                              |
| General                              | N                                               | Fatigue                                           | Chronic pain     | Fatigue, fevers 1 - 2x/wk, weight loss                              | Fatigue | Fatigue, body aches, weight gain               | N                          | Fatigue                            | Fatigue                        |
| Photosensitivity                     | N                                               | Y                                                 | N                | Y                                                                   | Y       | Y                                              | N                          | Y                                  | Y                              |
| Other rashes                         | N                                               | N                                                 | Vertex scalp DLE | Pink pruritic papular eruption on the face, chest, back, arms, legs | N       | Stress-induced rash on face, arms, hands, legs | Malar rash with flares     | Annular eruption on chest and back | Eruption on neck, arms, chins  |
| Oral and nasal ulcers                | N                                               | N                                                 | N                | Y                                                                   | N       | Y                                              | N                          | N                                  | N                              |
| Raynaud's                            | N                                               | N                                                 | N                | Y                                                                   | -       | -                                              | -                          | N                                  | N                              |
| Neurologic disorders                 | Seizures in 1983 from uncontrolled hypertension | Seizures, stroke, varicella zoster CNS vasculitis | N                | N                                                                   | N       | Migraines                                      | N                          | N                                  | N                              |
| Joint pains                          | N                                               | N                                                 | Y                | N                                                                   | Y       | Y                                              | Y                          | N                                  | Y                              |
| Cardiovascular/Respiratory disorders | Hypertension                                    | N                                                 | N                | Prior pericarditis and pleuritis                                    | N       | Hypertension                                   | Pericarditis and pleuritis | Myocardial infarction age 58       | Chronic heart failure, chronic |

|                              |                   |                                      |                     |                                                                            |                           |                    |                   |                          |                               |
|------------------------------|-------------------|--------------------------------------|---------------------|----------------------------------------------------------------------------|---------------------------|--------------------|-------------------|--------------------------|-------------------------------|
|                              |                   |                                      |                     |                                                                            |                           |                    |                   |                          | obstructive pulmonary disease |
| Vascular disorders           | N                 | DVT right leg                        | N                   | N                                                                          | N                         | DVT                | N                 | N                        | N                             |
| Renal disorders              | Lupus nephritis   | Lupus nephritis                      | N                   | Lupus nephritis class IV                                                   | N                         | N                  | N                 | N                        | N                             |
| GI disorders                 | N                 | Vomiting                             | N                   | Diarrhea and vomiting                                                      | Prior esophageal dilation | Constipation       | N                 | N                        | N                             |
| Ro60 ELISA (Dr. Fooke)       | Positive (RU 3.4) | Negative (RU 0.3)                    | Negative (RU 0.7)   | Positive (RU 12.1)                                                         | Negative (RU 0.1)         | Negative (RU 0.5)  | Positive (RU 3.1) | Positive (RU 2.9)        | Positive (RU 5.3)             |
| HLA DRB1*0301 (PCR)          | P                 | P                                    | P                   | P                                                                          | N                         | N                  | N                 | P                        | N                             |
| HLA DRB1*0301-0302 (PCR)     | P                 | P                                    | N                   | P                                                                          | N                         | N                  | N                 | P                        | N                             |
| HLA DR15 (PCR)               | P                 | P                                    | N                   | N                                                                          | N                         | P                  | N                 | N                        | N                             |
| HLA DR53 (PCR)               | N                 | N                                    | N                   | P                                                                          | -                         | -                  | -                 | N                        | -                             |
| <b>VISIT 1</b>               | <b>Y</b>          | <b>Y</b>                             | <b>Y</b>            | <b>Y</b>                                                                   | <b>Y</b>                  | <b>Y</b>           | <b>Y</b>          | <b>Y</b>                 |                               |
| Hydroxychloroquine           | 200 mg daily      | 200 mg twice daily                   | 200 mg daily        | 200 mg twice daily                                                         | 200 mg twice daily        | 200 mg twice daily | N                 | 200 mg twice daily       | N                             |
| Immunomodulatory medications | N                 | Mycophenolic acid 360 mg twice daily | N                   | Mycophenolic acid 1080 mg twice daily, Methotrexate 25 mg weekly, Benlysta | N                         | N                  | N                 | Azathioprine 50 mg daily | N                             |
| Prednisone                   | N                 | 10 mg daily                          | N                   | 7.5 mg daily                                                               | N                         | 7 mg daily         | N                 | N                        | N                             |
| Analgesics                   | N                 | N                                    | Oxycodone, morphine | Oxycodone/acetaminophen, fentanyl transdermal patch                        | N                         | Oxycodone          | N                 | N                        | N                             |
| Anticoagulants               | Aspirin           | Warfarin                             | N                   | N                                                                          | N                         | Enoxaparin         | N                 | Aspirin                  | Prasugrel, aspirin            |



|                                 |                                                           |                                                        |                                                                                      |                                                            |                                                   |                                                                                                         |                                          |                                                                        |                                                                             |
|---------------------------------|-----------------------------------------------------------|--------------------------------------------------------|--------------------------------------------------------------------------------------|------------------------------------------------------------|---------------------------------------------------|---------------------------------------------------------------------------------------------------------|------------------------------------------|------------------------------------------------------------------------|-----------------------------------------------------------------------------|
| Antihypertensives               | Nifedipine, enalapril                                     | N                                                      | N                                                                                    | Amlodipine, carvedilol                                     | N                                                 | Lisinopril                                                                                              | N                                        | Amlodipine                                                             | Metoprolol                                                                  |
| Proton pump inhibitor           | N                                                         | N                                                      | Esomeprazole                                                                         | Pantoprazole                                               | Lansoprazole                                      | N                                                                                                       | N                                        | Omeprazole                                                             | N                                                                           |
| Other prescription medications  | N                                                         | Gabapentin, valacyclovir, lorazepam                    | Gabapentin                                                                           | Trazodone                                                  | Linacotide, Mometasone furoate inhaled, albuterol | Zolpidem, albuterol, tiotropium, botulinum toxin, metoclopramide, senna, marijuana, polyethylene glycol | Etonorgestrel implant                    | Levothyroxine, Ursodiol, conjugated estrogen, progesterone, ranitidine | Tamsulosin, finasteride, alprazolam, atorvastatin, escitalopram, furosemide |
| Vitamins, minerals, supplements | Multivitamin                                              | Vitamin D, vitamin B12, biotin                         | Folic acid                                                                           | Folic acid                                                 | Vitamin D                                         | Calcium, Vitamin D, multivitamin                                                                        | Biotin, multivitamin                     | Vitamin D, vitamin B, calcium, fish oil                                | N                                                                           |
| Topical medications             | N                                                         | N                                                      | Clobetasol                                                                           | Triamcinolone, hydrocortisone, pimecrolimus                | Diclofenac 1% gel                                 | N                                                                                                       | N                                        | Triamcinolone                                                          | Triamcinolone, betamethasone                                                |
| Breakfast                       | Oatmeal with banana, cantaloupe, tea with sugar and cream | Gluten free banana bread                               | None                                                                                 | Eggs, grilled cheese, coffee, sugar, almond milk, iced tea | Peanut butter, white bread, orange-flavored drink | Coffee, cream, sugar                                                                                    | Granola bar, fruit-flavored cereal, milk | Cheese Danish, coffee, cream                                           | Bialy bread, butter, coffee, cream                                          |
| Lunch                           | Chicken soup, 2 slices rye toast with cream cheese        | None                                                   | Steak and cheese with mushrooms and lettuce sandwich, tomatoes, low-calorie lemonade | Cannot remember                                            | White rice, red beans, orange-flavored soda       | N                                                                                                       | Chicken wings, fried rice with pork      | Apple                                                                  | Ham and cheese sandwich                                                     |
| Dinner                          | Pork roast, fettucini alfredo, peas                       | Carrot, ginger, onion soup; chicken broth, gluten free | Steak, baked potato with swiss cheese, low-calorie                                   | 3 bowls sweetened oatmeal, bread with chocolate            | More rice and beans, peanut butter + white bread  | Macaroni with cheese, collard greens, ribs with barbeque                                                | Grilled chicken, vegetables, cheese,     | Chicken, spinach, cabbage-beet salad,                                  | Chicken salad, potatoes, ice cream,                                         |

|                                       |                               |                                                                          |                                                                                  |                            |                                                                     |                                                                                             |                                                                             |                              |                                                                   |
|---------------------------------------|-------------------------------|--------------------------------------------------------------------------|----------------------------------------------------------------------------------|----------------------------|---------------------------------------------------------------------|---------------------------------------------------------------------------------------------|-----------------------------------------------------------------------------|------------------------------|-------------------------------------------------------------------|
|                                       |                               | bread, 2 chocolate chip cookies                                          | lemonade                                                                         | spread, juice, 2 sips wine |                                                                     | sauce, corn bread, butter                                                                   | potatoes, red wine cocktail                                                 | chocolate chip cookies, milk | chamomile tea, 1 beer                                             |
| Major dietary changes in last 2 weeks | N                             | N                                                                        | N                                                                                | N                          | N                                                                   | N                                                                                           | N                                                                           | N                            | N                                                                 |
| Bristol stool scale                   | type 1                        | type 3                                                                   | type 7                                                                           | type 5                     | -                                                                   | -                                                                                           | -                                                                           | type 2                       | -                                                                 |
| <b>VISIT 2</b>                        | Y                             | Y                                                                        | Y                                                                                | N                          | Y                                                                   | Y                                                                                           | Y                                                                           | N                            | Y                                                                 |
| Change in health                      | N                             | N                                                                        | N                                                                                |                            | Miscarriage                                                         | N                                                                                           | N                                                                           |                              | N                                                                 |
| Protocol deviations                   | N                             | N                                                                        | N                                                                                |                            | Antibiotic use 4 weeks prior to visit, brushed teeth prior to visit | N                                                                                           | N                                                                           |                              | N                                                                 |
| Change in medication                  | N                             | Stopped warfarin, started folic acid                                     | N                                                                                |                            | Stopped mometasone inhaler, started fluticasone inhaler             | N                                                                                           | N                                                                           |                              | Stopped topical steroids, started hydroxychloroquine 200 mg daily |
| Changes in diet                       | N                             | Added green leafy vegetables after stopping warfarin                     | N                                                                                |                            | N                                                                   | N                                                                                           | N                                                                           |                              | N                                                                 |
| Breakfast                             | Maple and brown sugar oatmeal | Banana, coffee with cream                                                | Blueberry muffin                                                                 |                            | Peanut butter, jelly, white bread                                   | None                                                                                        | Bacon, eggs, toast, butter, jelly, coffee, cream, sugar                     |                              | Bread, butter, banana, coffee, cream                              |
| Lunch                                 | Taco Bell crunch wrap supreme | Salad with tomatoes, cucumbers, italian dressing; baked chicken, roasted | Salad with lettuce, Swiss cheese, onions, pastrami, broccoli, celery, mushrooms, |                            | Peanut butter, jelly, white bread, cheese-flavored crackers, juice  | Chili hot dog, cheese, chili cheese fries, cranberry juice, coffee, orange soda, lemon-lime | Fish sandwich on white roll, tartar sauce, red plum juice, chocolate frappe |                              | Hamburger, bean, ice cream, melon                                 |

|                      |                                                                                                                         |                                                                      |                                                                              |   |               |                                                                                       |                                                                                             |      |                                        |
|----------------------|-------------------------------------------------------------------------------------------------------------------------|----------------------------------------------------------------------|------------------------------------------------------------------------------|---|---------------|---------------------------------------------------------------------------------------|---------------------------------------------------------------------------------------------|------|----------------------------------------|
|                      |                                                                                                                         | potatoes                                                             | raspberry wine vinaigrette, 1/2 cup beer                                     |   |               | soda                                                                                  |                                                                                             |      |                                        |
| Dinner               | Roasted pork loin with roasted potatoes, pork gravy, corn with butter                                                   | Cod fish, broccoli and mushrooms with olive oil and balsamic vinegar | Pizza with mushrooms, pepperoni, sausage, cheese, garlic powder, fruit punch |   |               | Peanut butter, jelly, white bread, banana, juice                                      | Tortilla chips, cheese, tomatoes, beef, beans, fried chicken, french fries, cranberry juice | None | Pasta with tomato sauce, chamomile tea |
| Bristol stool scale  | type 1                                                                                                                  | type 2                                                               | type 6                                                                       |   | type 7        | -                                                                                     | -                                                                                           |      | type 7                                 |
| <b>VISIT 3</b>       | Y                                                                                                                       | Y                                                                    | Y                                                                            | N | Y             | Y                                                                                     | N                                                                                           | N    | N                                      |
| Change in health     | N                                                                                                                       | N                                                                    | N                                                                            |   | N             | N                                                                                     |                                                                                             |      |                                        |
| Protocol deviations  | N                                                                                                                       | N                                                                    | N                                                                            |   | Brushed teeth | N                                                                                     |                                                                                             |      |                                        |
| Change in medication | N                                                                                                                       | Decreased prednisone to 7.5 mg daily                                 | N                                                                            |   | N             | Decreased prednisone to 5 mg daily, started diazepam                                  |                                                                                             |      |                                        |
| Changes in diet      | N                                                                                                                       | N                                                                    | N                                                                            |   | N             | N                                                                                     |                                                                                             |      |                                        |
| Breakfast            | Oatmeal, fresh pineapple, almonds, black tea, sugar, nonfat creamer, banana                                             | Banana, orange, coffee, cream                                        | Pink grapefruit                                                              |   | N             | Sausage, egg, cheese, roll                                                            |                                                                                             |      |                                        |
| Lunch                | Tortilla chips, guacamole, cheddar and bean dip, lettuce, carrots, breaded chicken, croutons, blue cheese dressing, 1/2 | Corn taco with beef, cheddar cheese, tomatoes, sour cream, salsa     | Pork chop, gravy, 1 beer                                                     |   |               | Pizza with sausage and pepperoni, turkey sandwich, lettuce, tomato, mayonnaise, onion | Hotdog, hotdog bun, fruit-flavored drink                                                    |      |                                        |

|                     |                                                      |                                                        |                                                                                      |  |                                                                        |                                                                     |  |  |  |  |
|---------------------|------------------------------------------------------|--------------------------------------------------------|--------------------------------------------------------------------------------------|--|------------------------------------------------------------------------|---------------------------------------------------------------------|--|--|--|--|
|                     | grilled cheese sandwich, hot chocolate, marshmallows |                                                        |                                                                                      |  |                                                                        |                                                                     |  |  |  |  |
| Dinner              | Pasta, green beans, black cherry seltzer, swiss roll | Veggie burger with hummus, broccoli, red pepper, onion | Sausage with green peppers and onions on a potato roll, low-calorie lemonade, 1 beer |  | Pierogi, noodle soup, flavored water, lemon-lime soda, chocolate candy | Cheese sandwich, cola, fruit juice, cheese-flavored chips, pretzels |  |  |  |  |
| Bristol stool scale | type 3                                               | type 1                                                 | type 5                                                                               |  | -                                                                      | -                                                                   |  |  |  |  |

\*Abbreviations: F, female; BMI, body mass index, SLE, systemic lupus erythematosus; SCLE, subacute lupus erythematosus; DLE, discoid lupus erythematosus; MCTD, mixed connective tissue disease; PBC, primary biliary cirrhosis; P, positive; N, negative/no; Y, yes; -, not available; RU, relative units.

**Table S3. Healthy control study subject clinical data.\***

| Subject                | NOR01              | NOR02              | NOR04                   | NOR05                                            | NOR06              | NOR07              | NOR08              | NOR09    | NOR10                        | NOR11        | NOR12        |
|------------------------|--------------------|--------------------|-------------------------|--------------------------------------------------|--------------------|--------------------|--------------------|----------|------------------------------|--------------|--------------|
| Visits completed       | 3                  | 1                  | 3                       | 1                                                | 3                  | 3                  | 3                  | 3        | 2                            | 3            | 3            |
| Age                    | 55                 | 32                 | 29                      | 36                                               | 29                 | 47                 | 55                 | 21       | 38                           | 40           | -            |
| Sex                    | F                  | F                  | F                       | F                                                | F                  | F                  | F                  | F        | F                            | F            | -            |
| Race                   | White              | Mixed              | White                   | Costa Rican                                      | White              | White              | White              | Black    | White                        | White        | White        |
| Ethnicity              | Not Hispanic       | Not Hispanic       | Not Hispanic            | Hispanic/Latina                                  | Not Hispanic       | Hispanic/Latina    | Not Hispanic       | Hispanic | Hispanic                     | Not Hispanic | Not Hispanic |
| Weight (kg)            | 74.8               | 89.8               | 94                      | 71                                               | 92.2               | 82.1               | 63.8               | 53.2     | 88.2                         | 77.4         | 58.9         |
| Height (inches)        | 67                 | 67                 | 67                      | 58                                               | 70                 | 61                 | 62.5               | 63       | 64                           | 69.5         | 63.75        |
| BMI                    | 25.8               | 31                 | 32.4                    | 32.7                                             | 29.1               | 34.2               | 25.3               | 20.8     | 33.4                         | 24.8         | 22.5         |
| Medical diagnoses      | Schatzki ring      | N                  | Alpha thalassemia trait | Hypothyroidism, hypertension, seasonal allergies | N                  | Migraine           | Hypothyroidism     | Asthma   | Anxiety, prior kidney stones | N            | N            |
| Ro60 ELISA (Dr. Fooke) | Negative (RU 0.29) | Negative (RU 0.34) | Negative (RU 0.10)      | Negative (RU 0.51)                               | Negative (RU 0.67) | Negative (RU 0.61) | Negative (RU 0.20) | -        | -                            | -            | -            |

|                                 |                                                                               |                                                                |                                                                     |                                    |                                                                     |                                                |                                                                                    |                                                      |                                                           |                                         |                                           |
|---------------------------------|-------------------------------------------------------------------------------|----------------------------------------------------------------|---------------------------------------------------------------------|------------------------------------|---------------------------------------------------------------------|------------------------------------------------|------------------------------------------------------------------------------------|------------------------------------------------------|-----------------------------------------------------------|-----------------------------------------|-------------------------------------------|
| HLA DRB1*0301 (PCR)             | N                                                                             | N                                                              | N                                                                   | N                                  | N                                                                   | N                                              | N                                                                                  | -                                                    | -                                                         | -                                       | -                                         |
| HLA DRB1*0301-0302 (PCR)        | N                                                                             | N                                                              | N                                                                   | N                                  | N                                                                   | N                                              | N                                                                                  | -                                                    | -                                                         | -                                       | -                                         |
| HLA DR15 (PCR)                  | N                                                                             | N                                                              | N                                                                   | N                                  | N                                                                   | N                                              | N                                                                                  | -                                                    | -                                                         | -                                       | -                                         |
| HLA DR53 (PCR)                  | N                                                                             | P                                                              | P                                                                   | P                                  | P                                                                   | N                                              | N                                                                                  | -                                                    | -                                                         | -                                       | -                                         |
| <b>VISIT 1</b>                  | <b>Y</b>                                                                      | <b>Y</b>                                                       | <b>Y</b>                                                            | <b>Y</b>                           | <b>Y</b>                                                            | <b>Y</b>                                       | <b>Y</b>                                                                           | <b>Y</b>                                             | <b>Y</b>                                                  | <b>Y</b>                                | <b>Y</b>                                  |
| Prescription medications        | N                                                                             | N                                                              | N                                                                   | Levothyroxine, hydrochlorothiazide | N                                                                   | Sumatriptan                                    | Levothyroxine                                                                      | Albuterol                                            | Clonazepam, gabapentin, nortriptyline, oral contraceptive | N                                       | Sertraline                                |
| Vitamins, minerals, supplements | Multivitamin, omega 3, fiber, melatonin, calcium, glucosamine and chondroitin | N                                                              | Ibuprofen                                                           | N                                  | Multivitamin                                                        | Vitamin C, vitamin D                           | N                                                                                  | N                                                    | N                                                         | N                                       | N                                         |
| Breakfast                       | Banana, milk                                                                  | Tea, milk, sugar, orange juice                                 | English muffin, low-fat peanut butter, sugar, coffee, skim milk     | None                               | Chocolate protein shake, banana, spinach, dry peanut butter, coffee | Coffee, whole milk, sugar, white bread, butter | Rye bread with mayonnaise, ham, roasted red peppers; black coffee with coconut oil | Donut, coffee with sugar, cream, chocolate           | Coffee with cream and sugar, biscuit                      | Milk, banana, grapes                    | Bagel, cream cheese, coffee, cream, sugar |
| Lunch                           | Salad, diet carbonated soda, cake, cheese                                     | Egg and cheese sandwich on wheat bread, tomato, coffee, cream, | Turkey sandwich on wheat roll with mustard, clementine, wheat thins | Cannot recall                      | Peanuts                                                             | Chicken nuggets, hamburger, French fries       | Rye bread with red peppers                                                         | Cheese flavored corn puffs, chocolate and cookie bar | N                                                         | Rice, chicken, cabbage, carrots, yogurt | Cheese pizza                              |

|                                       |                                          |                                                    |                                                                        |                                                                                            |                                                                                                                               |                                                                             |                                                                                                                |                                                              |                                                                                                   |                                                                                  |                                                                                   |
|---------------------------------------|------------------------------------------|----------------------------------------------------|------------------------------------------------------------------------|--------------------------------------------------------------------------------------------|-------------------------------------------------------------------------------------------------------------------------------|-----------------------------------------------------------------------------|----------------------------------------------------------------------------------------------------------------|--------------------------------------------------------------|---------------------------------------------------------------------------------------------------|----------------------------------------------------------------------------------|-----------------------------------------------------------------------------------|
|                                       |                                          | sugar                                              |                                                                        |                                                                                            |                                                                                                                               |                                                                             |                                                                                                                |                                                              |                                                                                                   |                                                                                  |                                                                                   |
| Dinner                                | Linguini, clam sauce                     | Chicken wing, vegetable soup, 2 small spring rolls | Grilled chicken breast, temaki sauce, roasted potatoes, broccoli, beer | Cactus, octopus, shrimp, crab, tomatoes, onions, cilantro fried chicken, lemon juice, wine | Grilled chicken, onions, green pepper, wheat tortilla wrap, guacamole, tomato salsa, cheese mix, Zero calorie carbonated soda | Beef stew with potatoes, white rice                                         | Vegetable and chicken soup over spaetzle noodles, mushrooms, carrots, parsnips, pepper, celery and celery root | Rice, beans, broccoli, asparagus, blueberry juice with mango | Coconut shrimp, stuffed clams, roll, butter, lemon-lime soda, cola, vanilla ice cream, white wine | Green tea, tomato, cheese, bread, sunflower seeds, almonds, walnuts, dried fruit | Pork meatballs, cranberry and beet sauce, brown rice, sour cream, sports beverage |
| Major dietary changes in last 2 weeks | N                                        | N                                                  | N                                                                      | Not answered                                                                               | Not answered                                                                                                                  | N                                                                           | N                                                                                                              | N                                                            | N                                                                                                 | Ate Indian food                                                                  | N                                                                                 |
| Bristol stool scale                   | type 3                                   | type 3                                             | type 4                                                                 | type 7                                                                                     | type 2                                                                                                                        | type 4                                                                      | type 4                                                                                                         | type 5                                                       | type 1                                                                                            | -                                                                                | type 3.5                                                                          |
| <b>VISIT 2</b>                        | Y                                        | N                                                  | Y                                                                      | N                                                                                          | Y                                                                                                                             | Y                                                                           | Y                                                                                                              | Y                                                            | Y                                                                                                 | Y                                                                                | Y                                                                                 |
| Change in health                      | Endoscopy with dilation of Schatzki ring |                                                    | N                                                                      |                                                                                            | N                                                                                                                             | N                                                                           | Syncopal episode                                                                                               | N                                                            | Sinusitis                                                                                         | N                                                                                | N                                                                                 |
| Protocol deviations                   | N                                        |                                                    | N                                                                      |                                                                                            | N                                                                                                                             | N                                                                           | N                                                                                                              | N                                                            | Antibiotic use 4 weeks prior                                                                      | N                                                                                | N                                                                                 |
| Change in medication                  | N                                        |                                                    | N                                                                      |                                                                                            | Started metformin                                                                                                             | N                                                                           | N                                                                                                              | N                                                            | N                                                                                                 | N                                                                                | N                                                                                 |
| Changes in diet                       | N                                        |                                                    | N                                                                      |                                                                                            | N                                                                                                                             | N                                                                           | N                                                                                                              | N                                                            | N                                                                                                 | N                                                                                | N                                                                                 |
| Breakfast                             | Banana, milk                             |                                                    | Wheat toast with peanut butter, coffee, skim milk                      |                                                                                            | Chocolate protein shake with banana, peanut butter, coconut milk, coffee, cream                                               | Eggs, vegetables, onion, American cheese, butter, coffee, whole milk, sugar | Coffee with coconut oil                                                                                        | Egg, cheese bread, orange juice                              | Cereal, milk, bagel, butter, coffee, cream, sugar                                                 | N                                                                                | Bagel, cream cheese, coffee, cream, sugar                                         |
| Lunch                                 | Salad with cranberries, blue cheese,     |                                                    | Beef and potato stew, apple, grapes,                                   |                                                                                            | Lasagne soup with chicken, sausage,                                                                                           | Chicken broth, chicken                                                      | Salad with spinach, eggs, barbecue                                                                             | Rice, beans, salad of                                        | Hot dog, bun, lemon-lime                                                                          | Bacon, lettuce, tomato,                                                          | Cheese pizza                                                                      |

|                      |                                                                   |   |                                 |   |                                                                                                                                                    |                       |                                                                                                                                           |                                                                    |                                               |                                                                                                      |                                                   |
|----------------------|-------------------------------------------------------------------|---|---------------------------------|---|----------------------------------------------------------------------------------------------------------------------------------------------------|-----------------------|-------------------------------------------------------------------------------------------------------------------------------------------|--------------------------------------------------------------------|-----------------------------------------------|------------------------------------------------------------------------------------------------------|---------------------------------------------------|
|                      | spinach, raspberry dresssing, walnuts, diet carbonated soft drink |   | yogurt                          |   | marinara sauce, chicken broth, whole wheat pasta, vanilla greek yogurt                                                                             | breast                | spare ribs, cranberries, sunflower seeds, chia seeds, flax seeds, bell pepper, roasted pepper, avocado                                    | cucumbers, lettuce, cheese, olive oil, lemon, orange juice         | soda                                          | bread, orange juice                                                                                  |                                                   |
| Dinner               | Onion soup, milk                                                  |   | Chicken, broccoli, rice, quinoa |   | Lasagne soup with chicken, sausage, marinara sauce, chicken broth, whole wheat pasta, Italian multigrain bread, butter, lemonade fruit punch, beer | Pizza, broccoli, Coke | Salad with spinach, eggs, barbecue spare ribs, cranberries, sunflower seeds, chia seeds, flax seeds, bell pepper, roasted pepper, avocado | Rice, beans, salad of cucumbers, lettuce, cheese, olive oil, lemon | Tacos with beef, cabbage, ketchup, mayonnaise | Spaghetti, tomato sauce, pickles, salad of lettuce, cucumber, onions, celery, olive oil, lemon juice | Turkey, cranberry sauce, potato, Brussels sprouts |
| Bristol stool scale  | type 5                                                            |   | type 2                          |   | type 2                                                                                                                                             | type 2                | type 4                                                                                                                                    | -                                                                  | -                                             | type 2                                                                                               | type 6                                            |
| <b>VISIT 3</b>       | Y                                                                 | N | Y                               | N | Y                                                                                                                                                  | Y                     | Y                                                                                                                                         | Y                                                                  | N                                             | Y                                                                                                    | Y                                                 |
| Change in health     | N                                                                 |   | N                               |   | N                                                                                                                                                  | N                     | N                                                                                                                                         | N                                                                  |                                               | N                                                                                                    | N                                                 |
| Protocol deviations  | N                                                                 |   | N                               |   | N                                                                                                                                                  | N                     | N                                                                                                                                         | N                                                                  |                                               | N                                                                                                    | N                                                 |
| Change in medication | N                                                                 |   | N                               |   | N                                                                                                                                                  | N                     | N                                                                                                                                         | Started eye health vitamin                                         |                                               | N                                                                                                    | N                                                 |
| Changes in diet      | N                                                                 |   | N                               |   | N                                                                                                                                                  | N                     | Started drinking smoothies 4 times per week with kale, spinach,                                                                           | N                                                                  |                                               | N                                                                                                    | N                                                 |

|           |                                                                                                   |  |                                                                                                                                                                 |  |                                                                                                                                    |                                                                                    |                                                                                                  |                                                                              |   |                                                                                  |                                            |
|-----------|---------------------------------------------------------------------------------------------------|--|-----------------------------------------------------------------------------------------------------------------------------------------------------------------|--|------------------------------------------------------------------------------------------------------------------------------------|------------------------------------------------------------------------------------|--------------------------------------------------------------------------------------------------|------------------------------------------------------------------------------|---|----------------------------------------------------------------------------------|--------------------------------------------|
|           |                                                                                                   |  |                                                                                                                                                                 |  |                                                                                                                                    |                                                                                    | mango, strawberry, coconut water                                                                 |                                                                              |   |                                                                                  |                                            |
| Breakfast | Apple cinnamon instant oatmeal, milk                                                              |  | Wheat bread, peanut butter, nectarine, coffee, milk                                                                                                             |  | Chocolate protein shake with powdered peanut butter, banana, coconut milk, coffee with creamer; snack of maple brown sugar oatmeal | Boiled egg, hash browns, coffee, milk, sugar, banana muffin                        | Wrap of guacamole, spinach, ham, mango, cheddar cheese, water with cucumber, mint, lemon         | Mango and kiwi smoothie, cream cheese and cheddar sandwich                   | N |                                                                                  | Bagel, cream cheese, coffee, milk, sugar   |
| Lunch     | Green salad, pear, dried cranberries, walnuts, French dressing, blue cheese, diet carbonated soda |  | Garden salad with cucumbers, carrots, red peppers, walnuts, dried cranberries, lettuce, and balsamic vinaigrette, broccoli and cheddar soup, crackers, croutons |  | Egg salad sandwich with lettuce on multigrain bread, potato chips                                                                  | Garden salad with sunflower seeds, croutons, French dressing, turkey, strawberries | Salad of mixed greens, chopped vegetables, shredded parmesan, water with cucumber mint and lemon | Broiled tilapia with salt, rice and beans, cucumber, mango and kiwi smoothie |   | Hamburger, greens, bread, plain yogurt                                           | Pad Thai noodles, chicken, lemon-lime soda |
| Dinner    | Pasta, cream sauce, parmesan cheese, raspberry sweetened iced tea                                 |  | Spaghetti with tomato sauce, meatball, grilled shrimp, beer                                                                                                     |  | Buffalo wings with cheese, bacon, and parmesan, mozzarella sticks with marinara sauce, 2 beers, hamburger with provolone           | Vegetables, pasta, cheese, Ding Dong chocolate cake                                | Salad of mixed greens and vegetables, shredded parmesan, cherries, water                         | Strawberries with chocolate-hazelnut spread                                  |   | Salad of tomatoes, beans, chicken, mixed greens, Italian dressing, biscuits, tea | Pasta, marinara sauce, cranberry juice     |



|                        |        |   |        |   |                                                |   |        |        |  |        |        |
|------------------------|--------|---|--------|---|------------------------------------------------|---|--------|--------|--|--------|--------|
|                        |        |   |        |   | cheese,<br>onions,<br>mushrooms,<br>tater tots |   |        |        |  |        |        |
| Bristol stool<br>scale | type 3 | - | type 5 | - | type 2                                         | - | type 5 | type 2 |  | type 2 | type 2 |

\*Note: NOR5/7/8/10 are subjects enrolled initially as healthy but with very common illnesses that carry no significant morbidity when treated. The medications taken by these individuals are not immunomodulatory. Abbreviations: F, female; BMI, body mass index, Y, yes; N, negative/no.

**Table S4. Efficiency and specificity of bacterial Ro60 qPCR primers.\***

| Primers                  | <i>B. theta</i>      | <i>P. prop</i>      | <i>A. mass</i>       | <i>C. amyc</i>      | <i>P. acnes</i> | <i>R. intes</i> | NTC |
|--------------------------|----------------------|---------------------|----------------------|---------------------|-----------------|-----------------|-----|
| <i>B. theta</i><br>SYBR  | 102.7%<br>efficiency | -                   | -                    | -                   | -               | -               | -   |
| <i>P. prop</i><br>TaqMan | -                    | 89.7%<br>efficiency | -                    | -                   | -               | -               | -   |
| <i>A. mass</i><br>TaqMan | 400x                 | 69x                 | 105.2%<br>efficiency | -                   | -               | 138x            | -   |
| <i>C. amyc</i><br>TaqMan | >3000x               | -                   | 200x                 | 99.8%<br>efficiency | -               | -               | -   |

\*First column indicates intended primer target. Additional columns indicate the results when DNA from single-species bacterial cultures was used as the template; NTC, no template control. - indicates no amplification. Numbers indicate the fold increase in off-target amplification. For example, if *A. mass* primers were used to amplify pure *B. theta* DNA, 400-times the amount *B. theta* DNA would be needed to obtain an equivalent C<sub>1</sub> value compared to *A. mass* DNA used as the template. *R. intes*, *R. intestinalis*.
